# Supplementary material for: CIAT with simultaneous epimerization at two stereocenters. Synthesis of substituted β-methyl-α-homophenylalanines
Source: Royal Society of Chemistry journal article supplement (doi:10.1039/b613103d), 2006-11-24

## Supportinf Information

# CIAT with simultaneous epimerization at two stereocenters. Synthesis of substituted $\beta$ -methyl- $\alpha$ -homophenylalanine.

By

Dušan Berkeš,<sup>\*a</sup> Pavol Jakubec,<sup>a</sup> Dagmar Winklerová<sup>a</sup>, František Považanec<sup>a</sup> and Adam Daich<sup>b</sup>

**Abstract.** Diastereoselective *aza*-Michael additions of phenylethylamine to 3-arylbutoenoic acids are reported. Efficient control over two new stereogenic centers on Michael acceptor has been possible *via* crystallization-induced asymmetric transformation (CIAT). A convenient two-step synthesis of *anti*- $\beta$ -methylhomophenylalanines is also described.

<sup>a</sup> Department of organic chemistry, Slovak University of Technology, Radlinského 9, SK-81237 Bratislava, Slovakia.

Fax: +421 2 52968560; Tel:+421 2 52968560; E-mail: [dusan.berkes@stuba.sk](mailto:dusan.berkes@stuba.sk)

<sup>b</sup> Laboratoire de Chimie, URCOM, Faculté des Sciences et Techniques de l'Université du Havre, 25, rue Philippe Lebon, B.P. : 540, F-76058 Le Havre Cedex, France.

Fax: +33 02-32-74-43-91; Tel:+33 02-32-74-44-03; E-mail: [adam.daich@univ-lehavre.fr](mailto:adam.daich@univ-lehavre.fr)

PJ 612

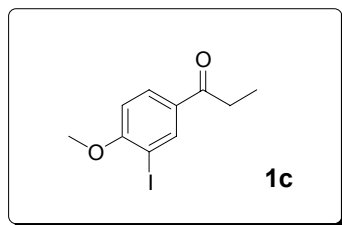

1-(3-iodo-4-methoxyphenyl)propan-1-one

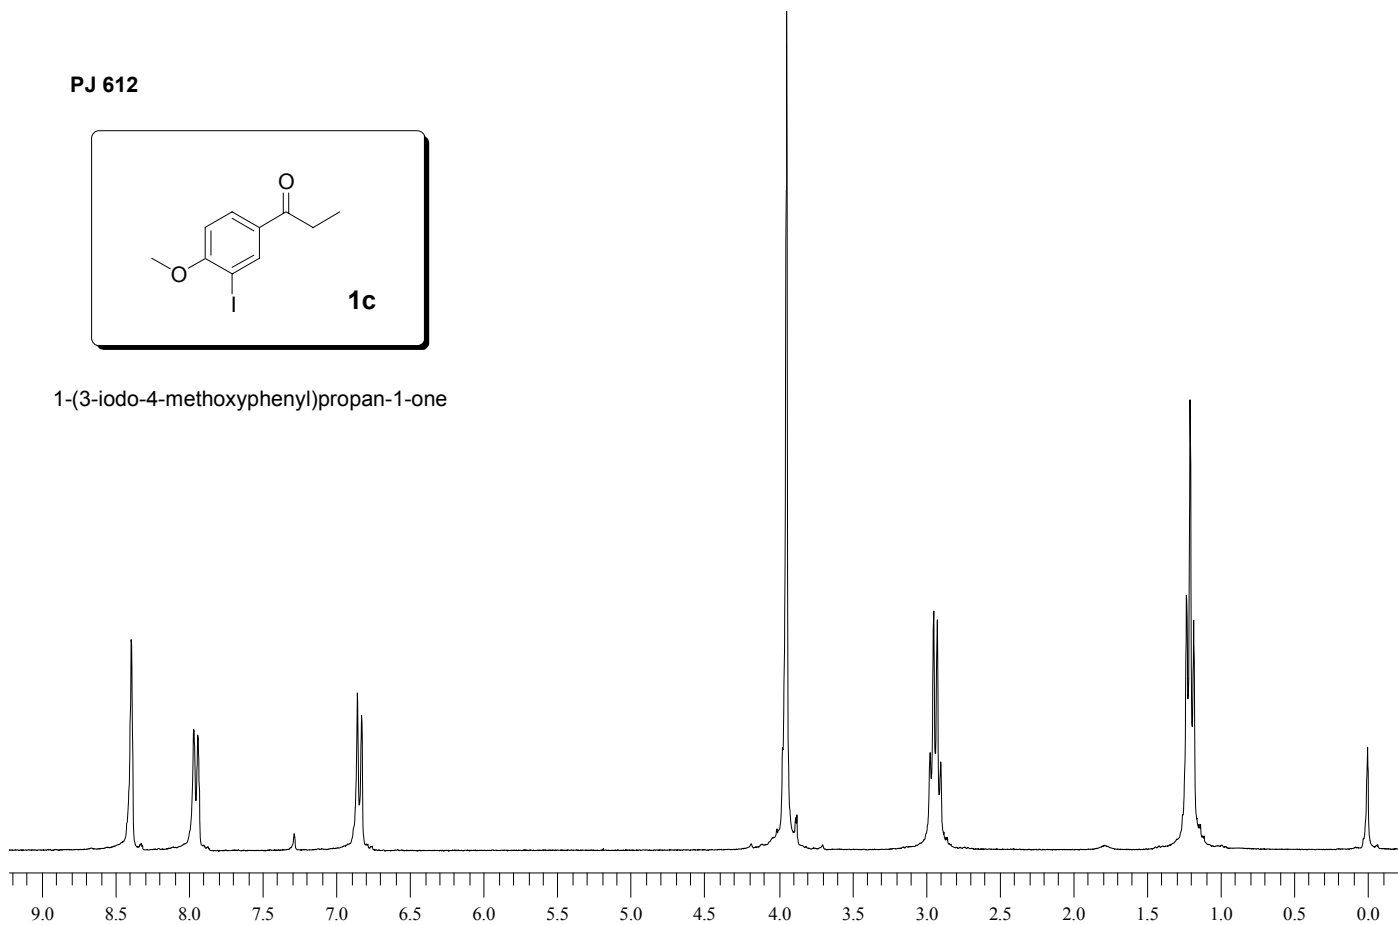

PJ 612

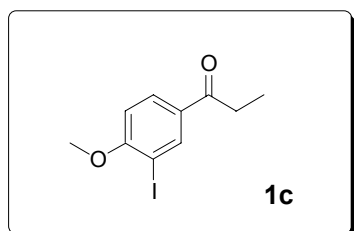

1-(3-iodo-4-methoxyphenyl)propan-1-one

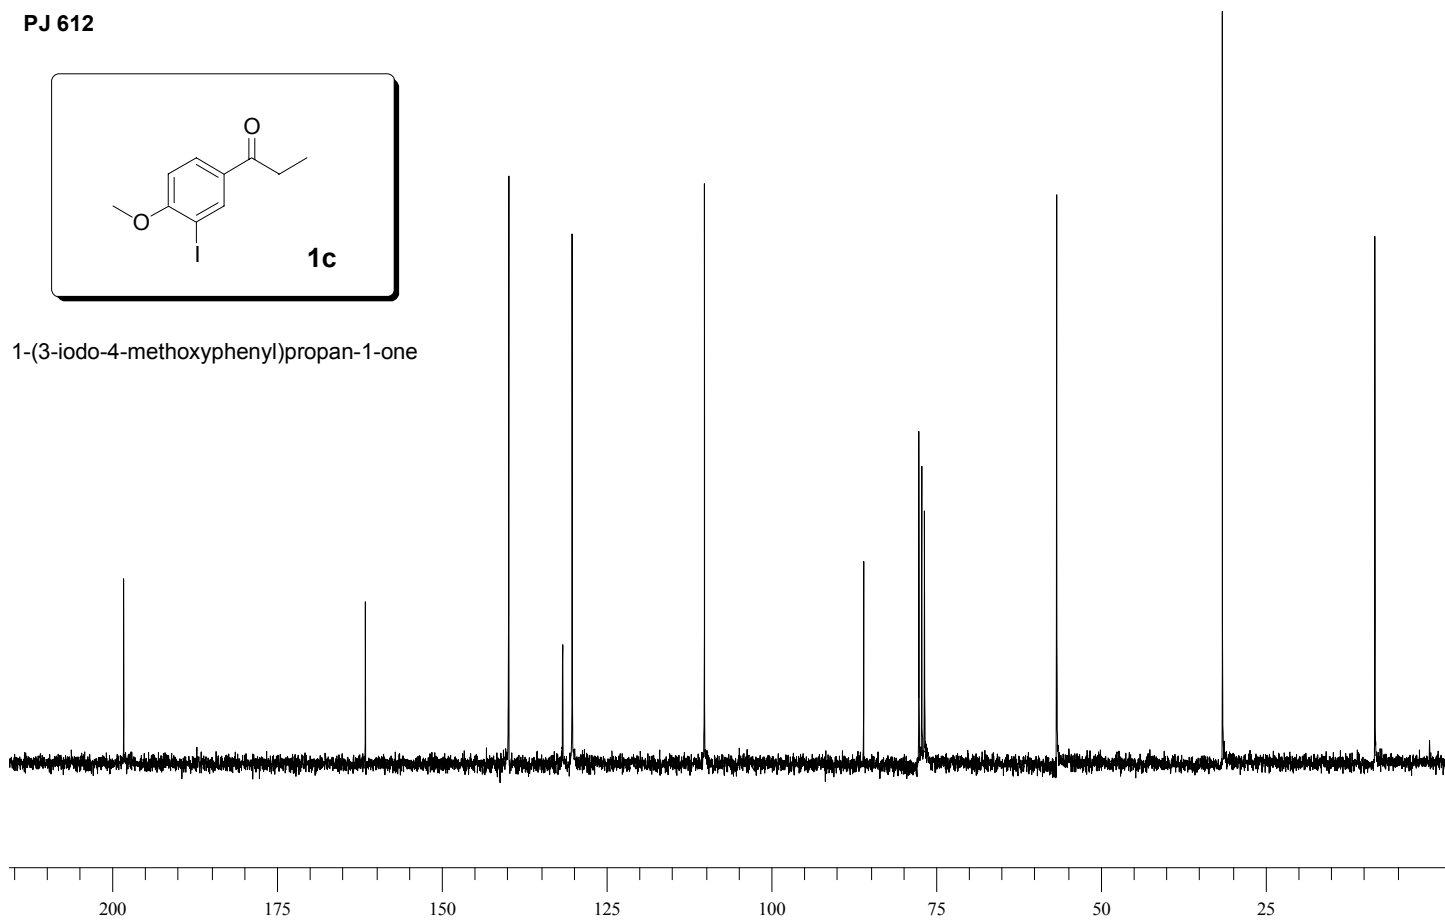

PJ 250

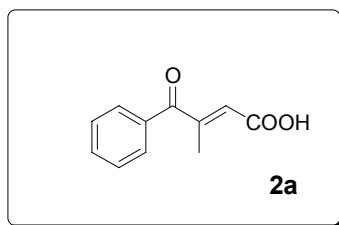

(2E)-3-Methyl-4-oxo-4-phenylbut-2-enoic acid

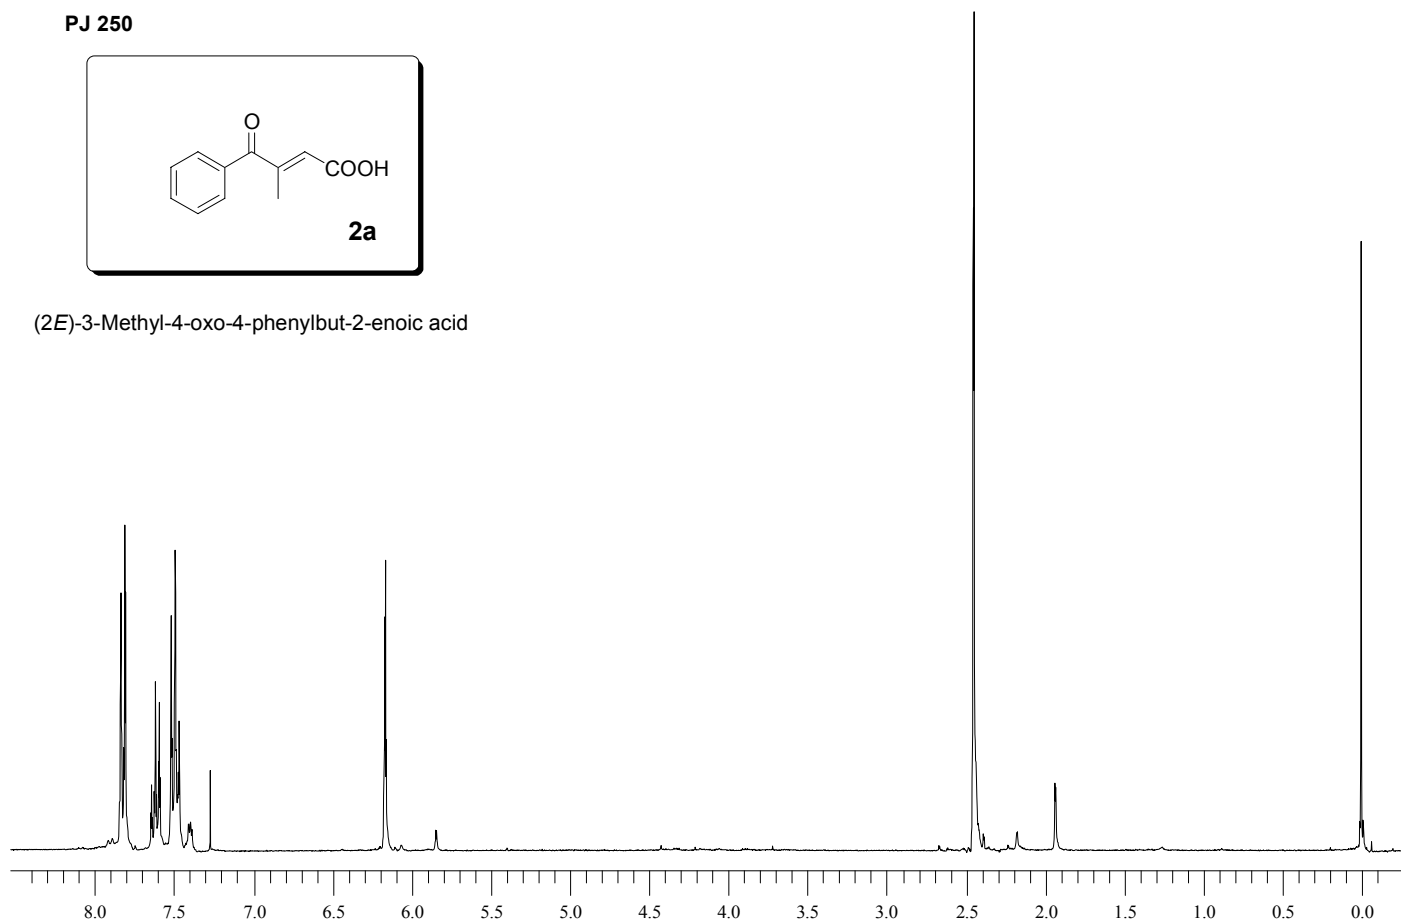

PJ 250

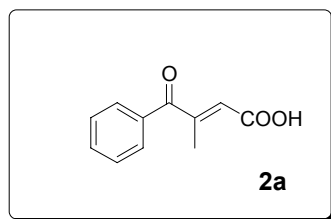

(2E)-3-Methyl-4-oxo-4-phenylbut-2-enoic acid

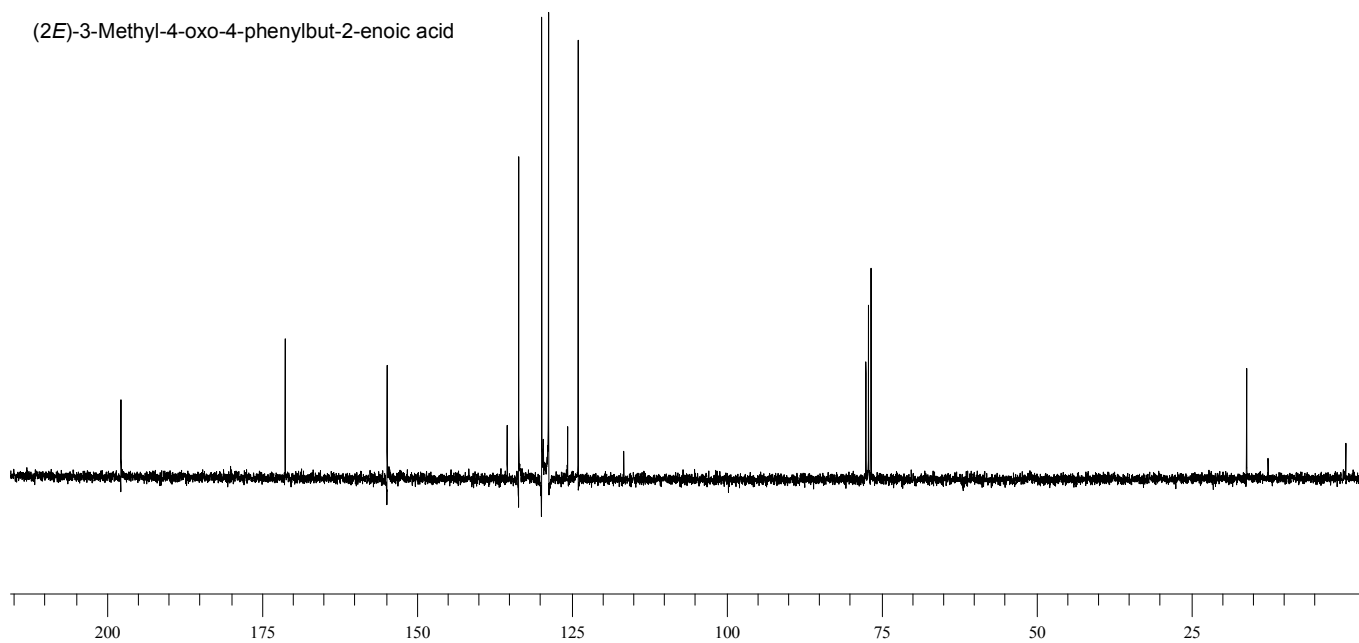

DW 163

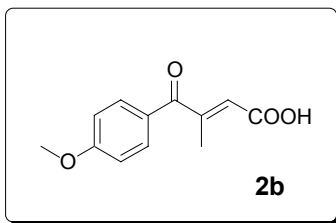

(2E)-4-(4-Methoxyphenyl)-3-methyl-4-oxobut-2-enoic acid

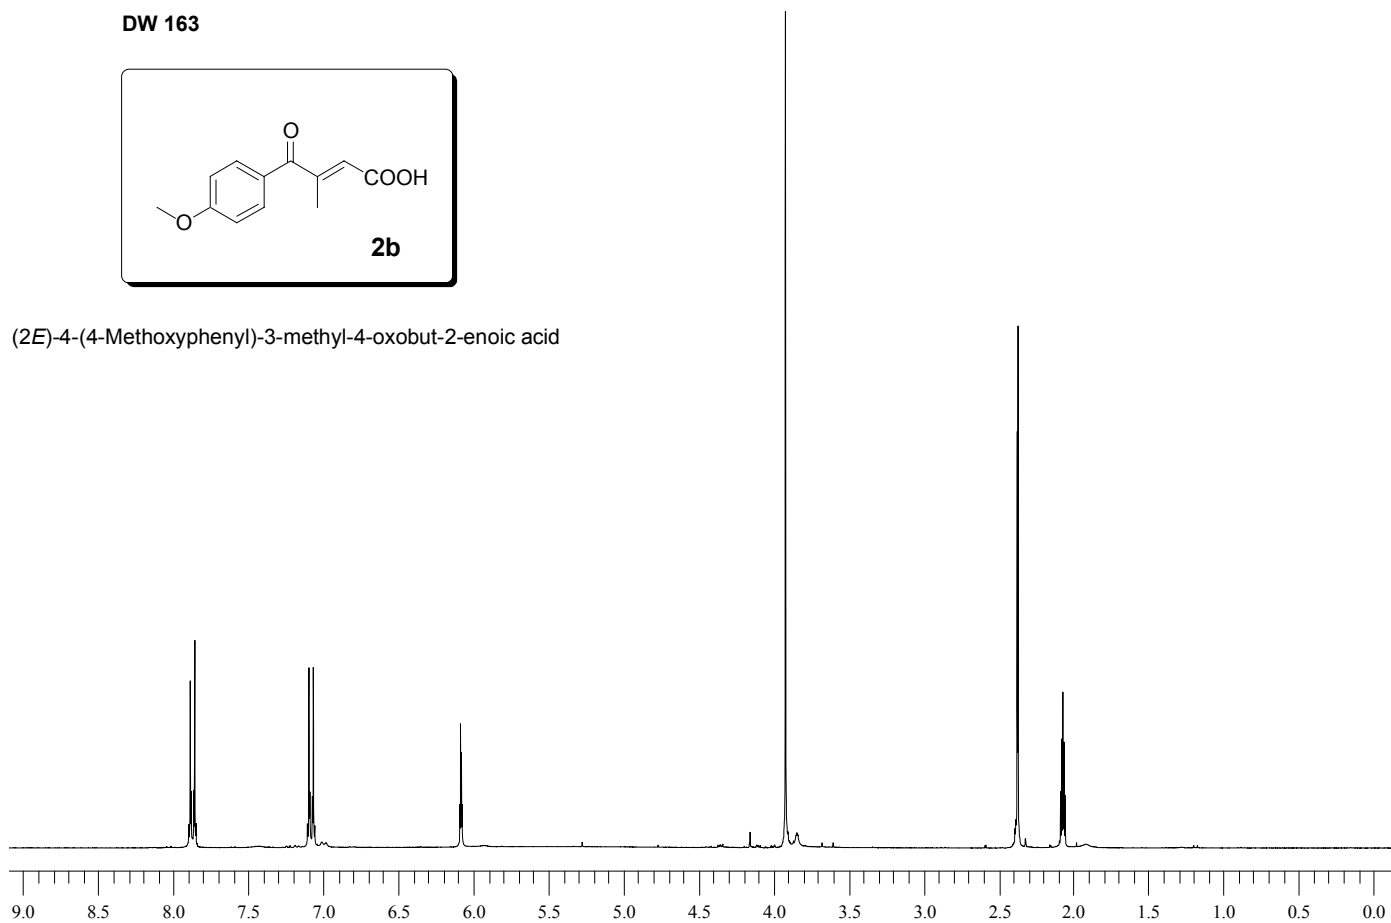

DW 163

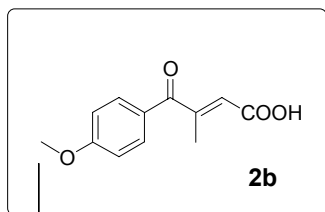

(2E)-4-(4-Methoxyphenyl)-3-methyl-4-oxobut-2-enoic acid

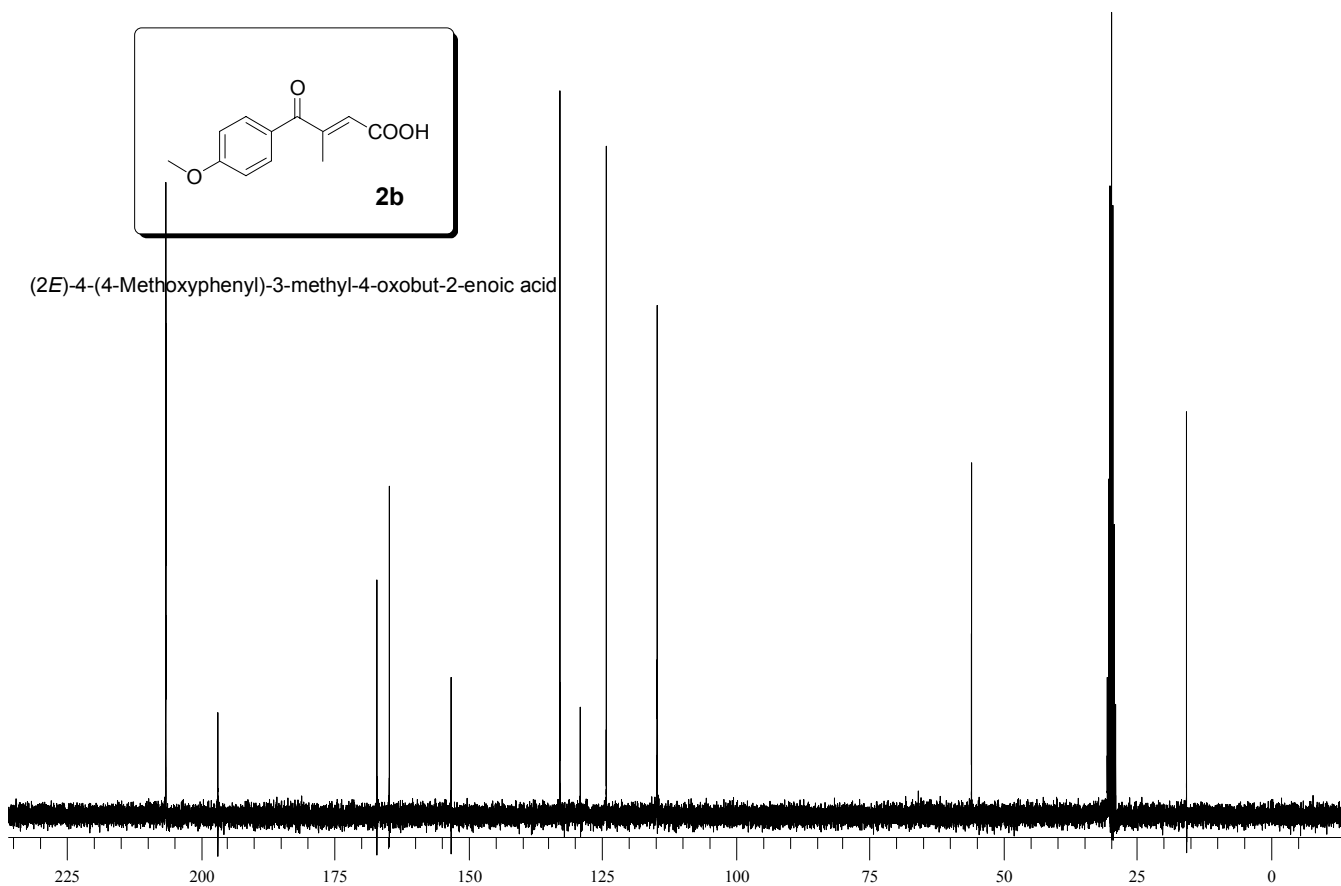

PJ 615

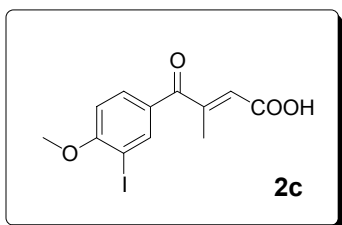

(2E)-4-(3-iodo-4-methoxyphenyl)-3-methyl-4-oxobut-2-enoic acid

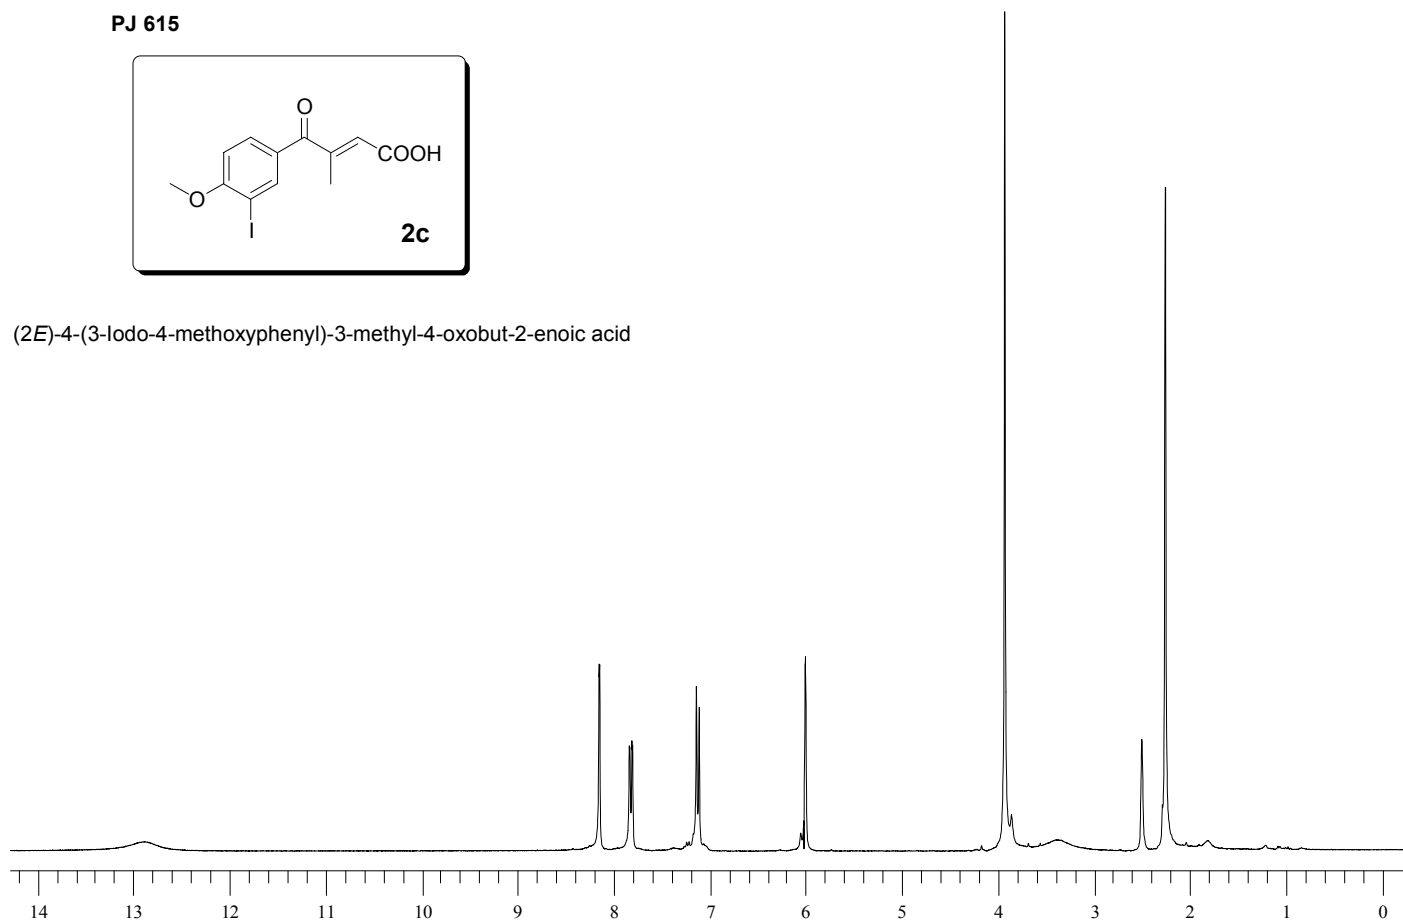

PJ 615

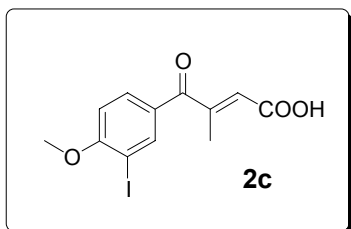

(2E)-4-(3-iodo-4-methoxyphenyl)-3-methyl-4-oxobut-2-enoic acid

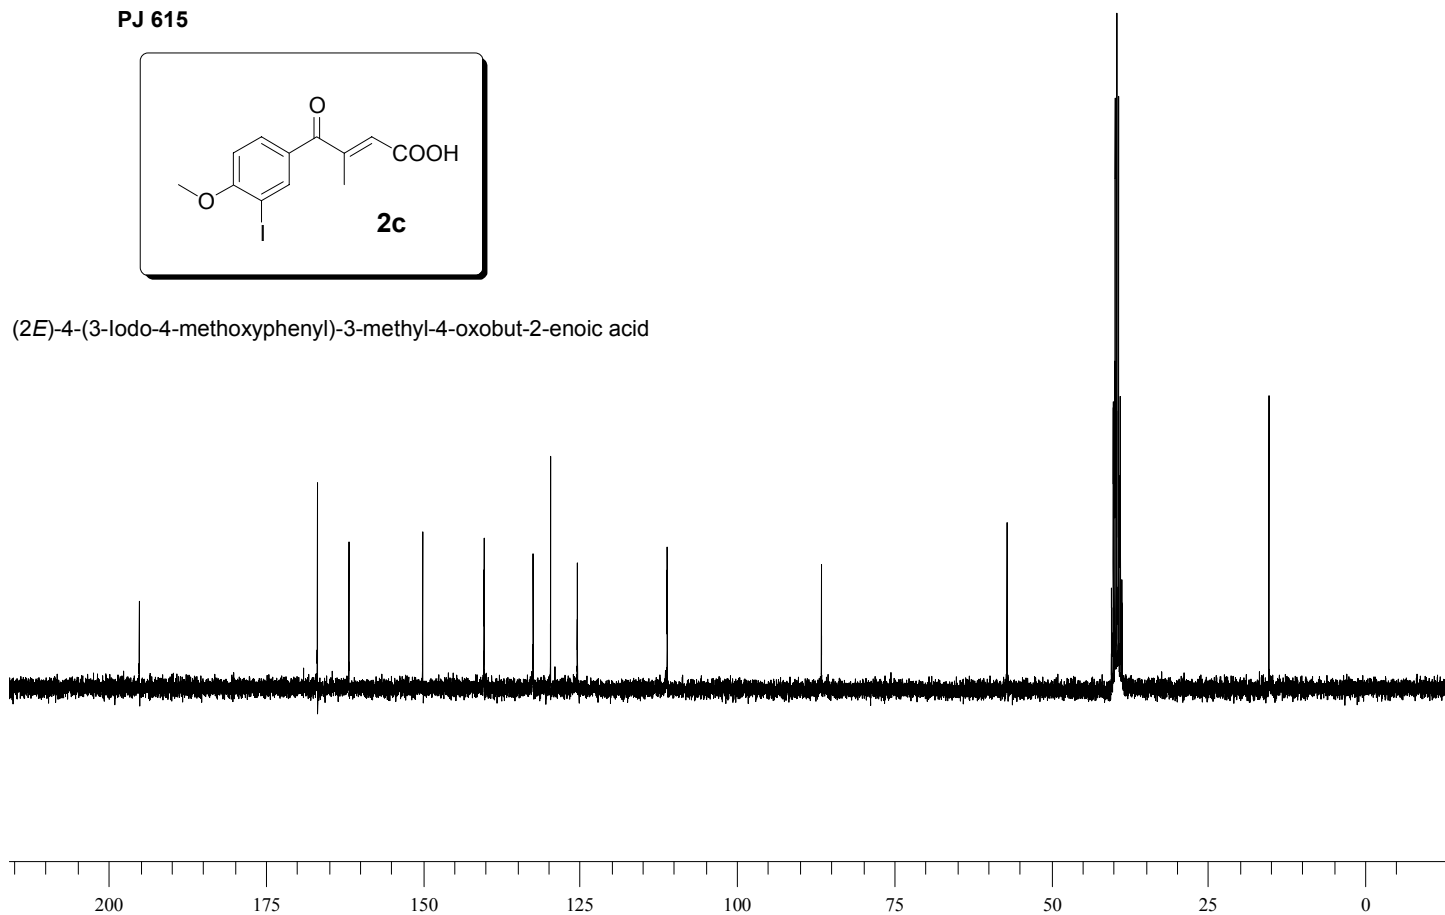

PJ 255

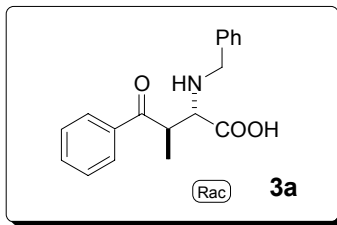

*rac*-(2*S*,3*R*)-2-(Benzylamino)-3-methyl-4-oxo-4-phenylbutanoic acid

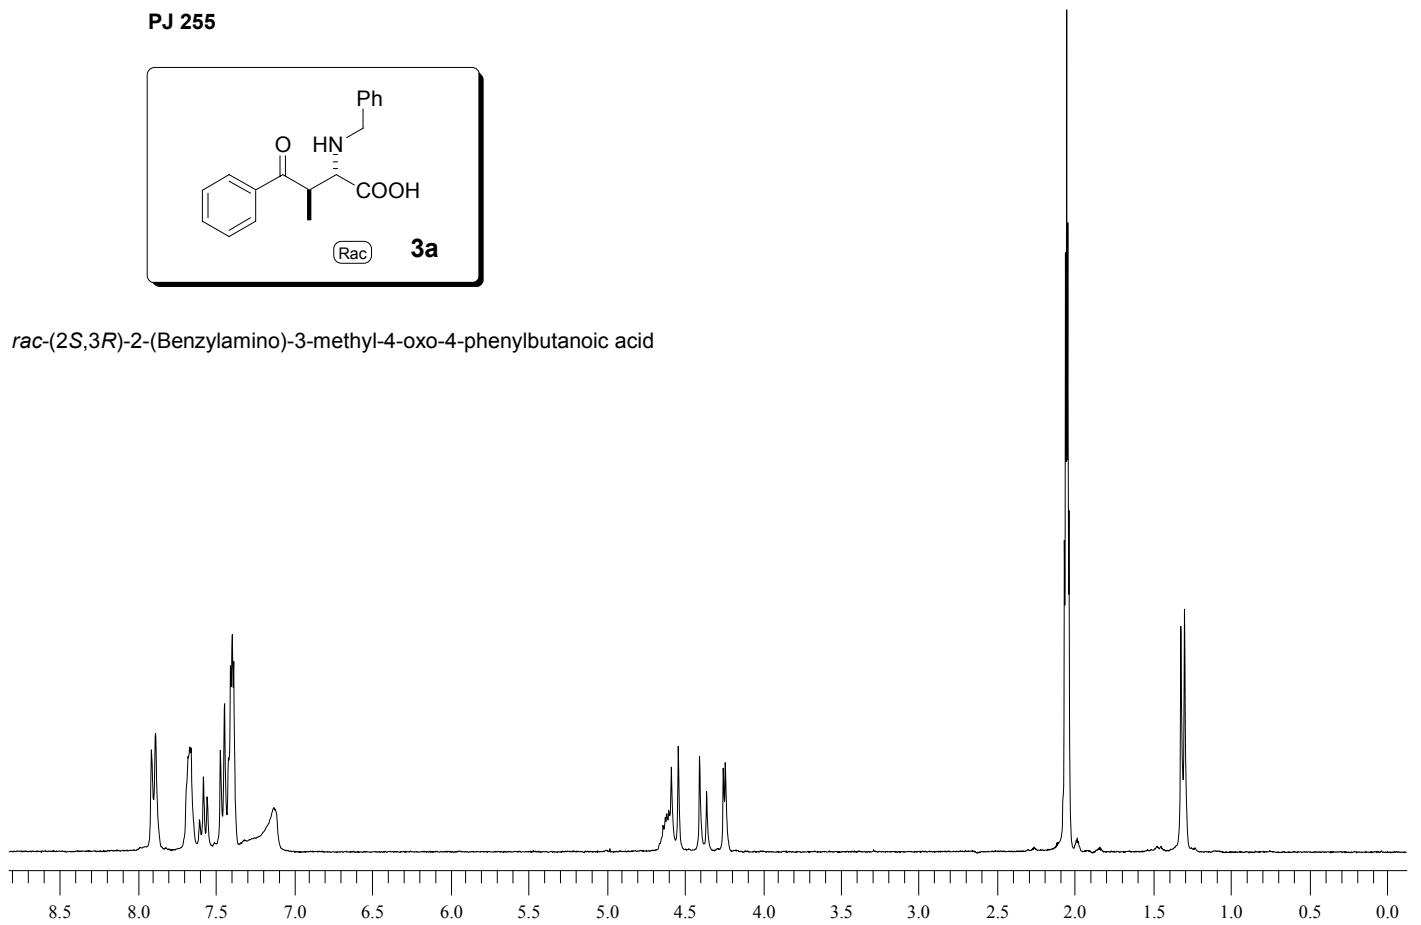

PJ 255

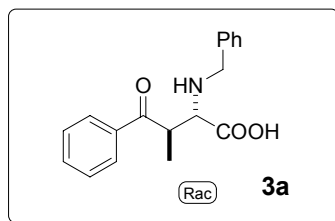

*rac*-(2*S*,3*R*)-2-(Benzylamino)-3-methyl-4-oxo-4-phenylbutanoic acid

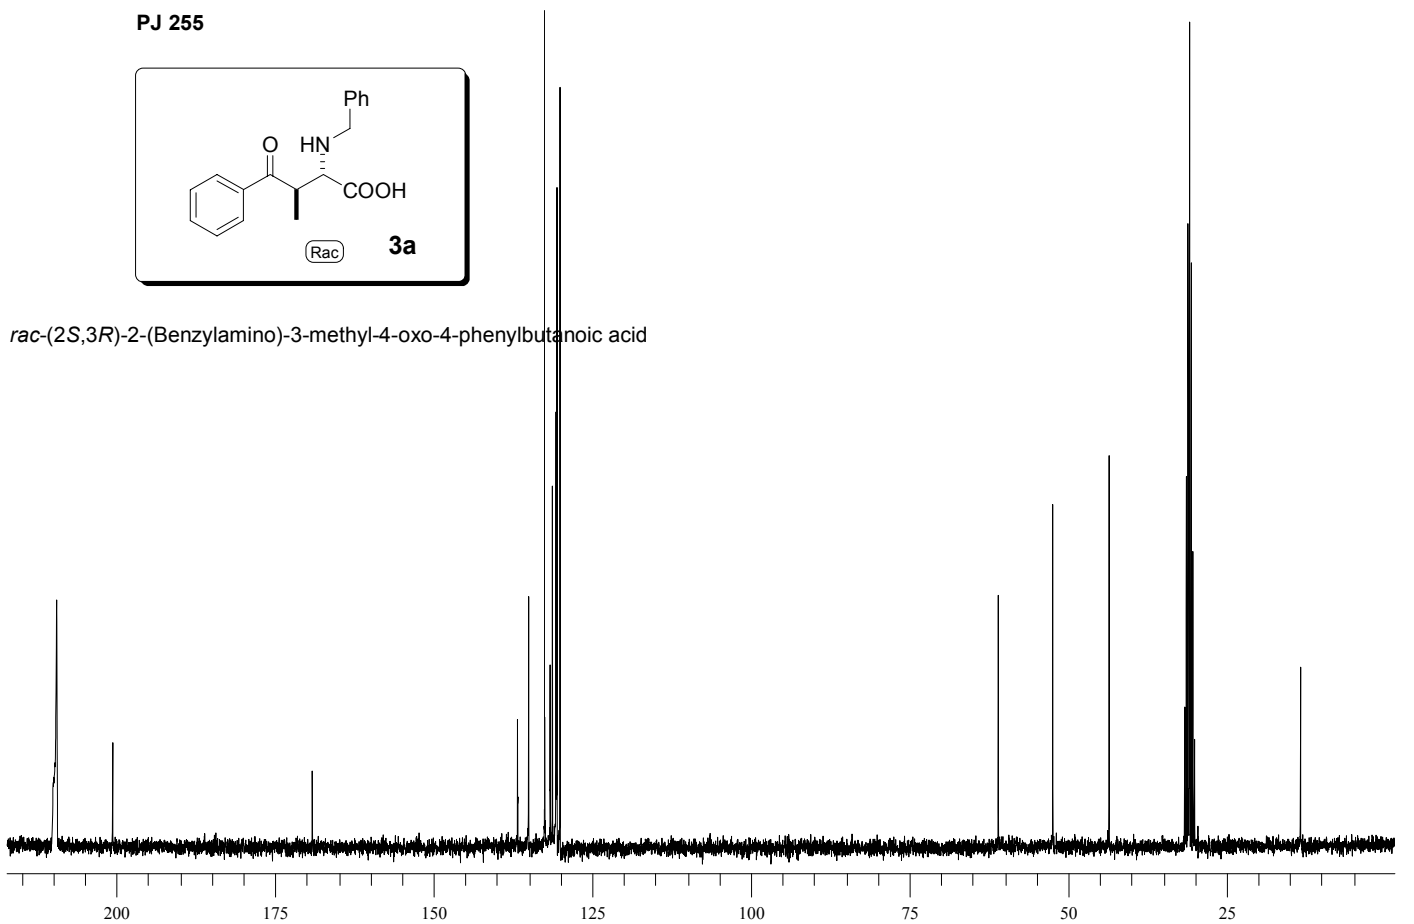

PJ 692

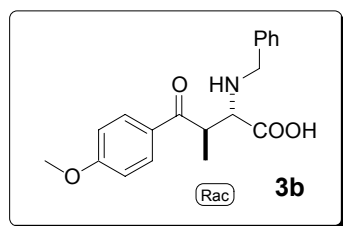

*rac*-(2*S*,3*R*)-2-(Benzylamino)-4-(4-methoxyphenyl)-3-methyl-4-oxobutanoic acid

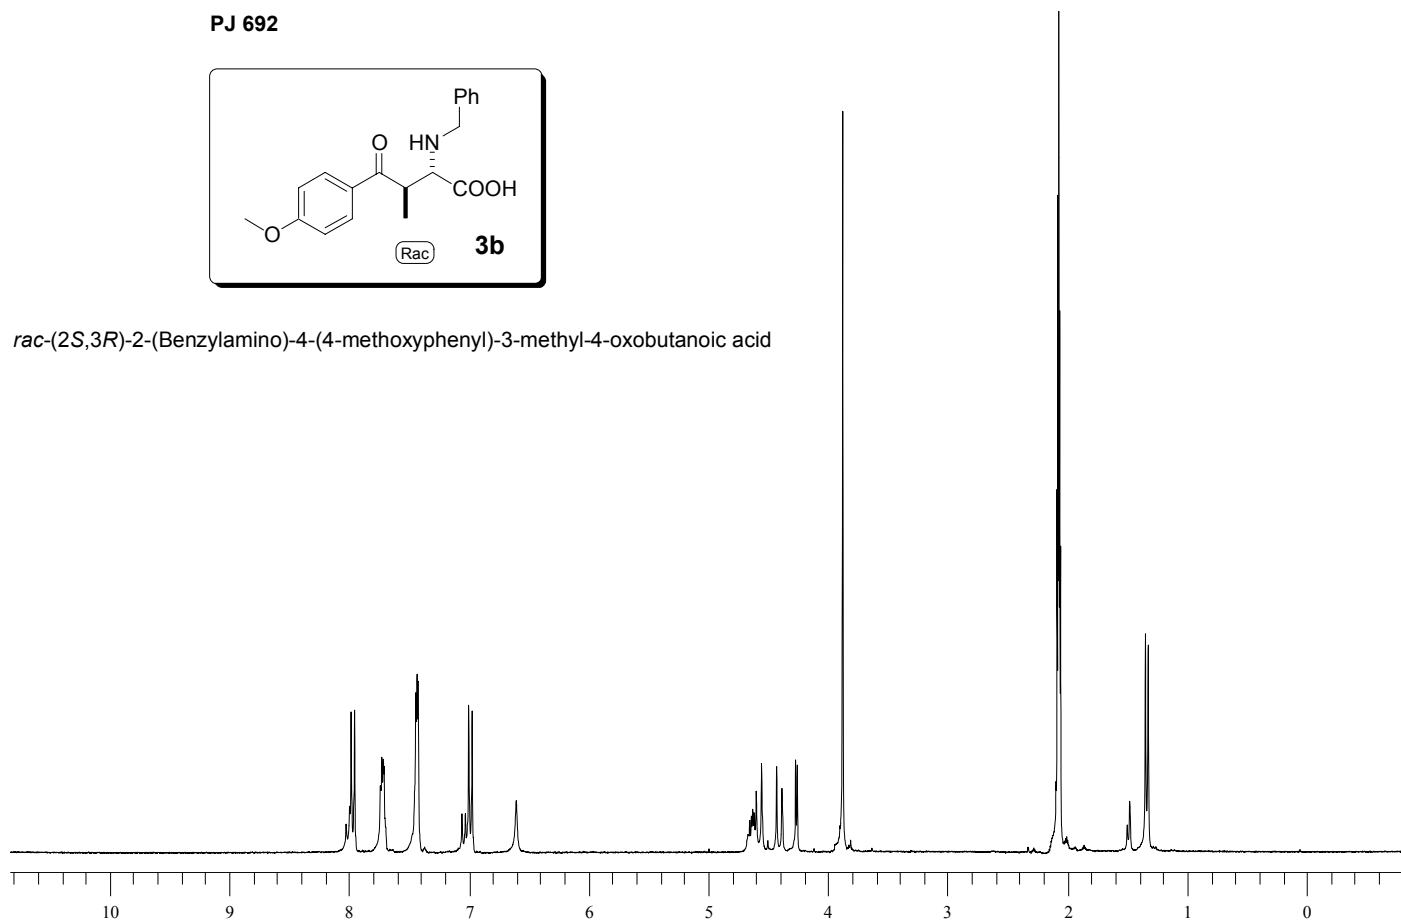

PJ 692

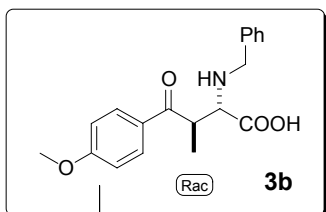

*rac*-(2*S*,3*R*)-2-(Benzylamino)-4-(4-methoxyphenyl)-3-methyl-4-oxobutanoic acid

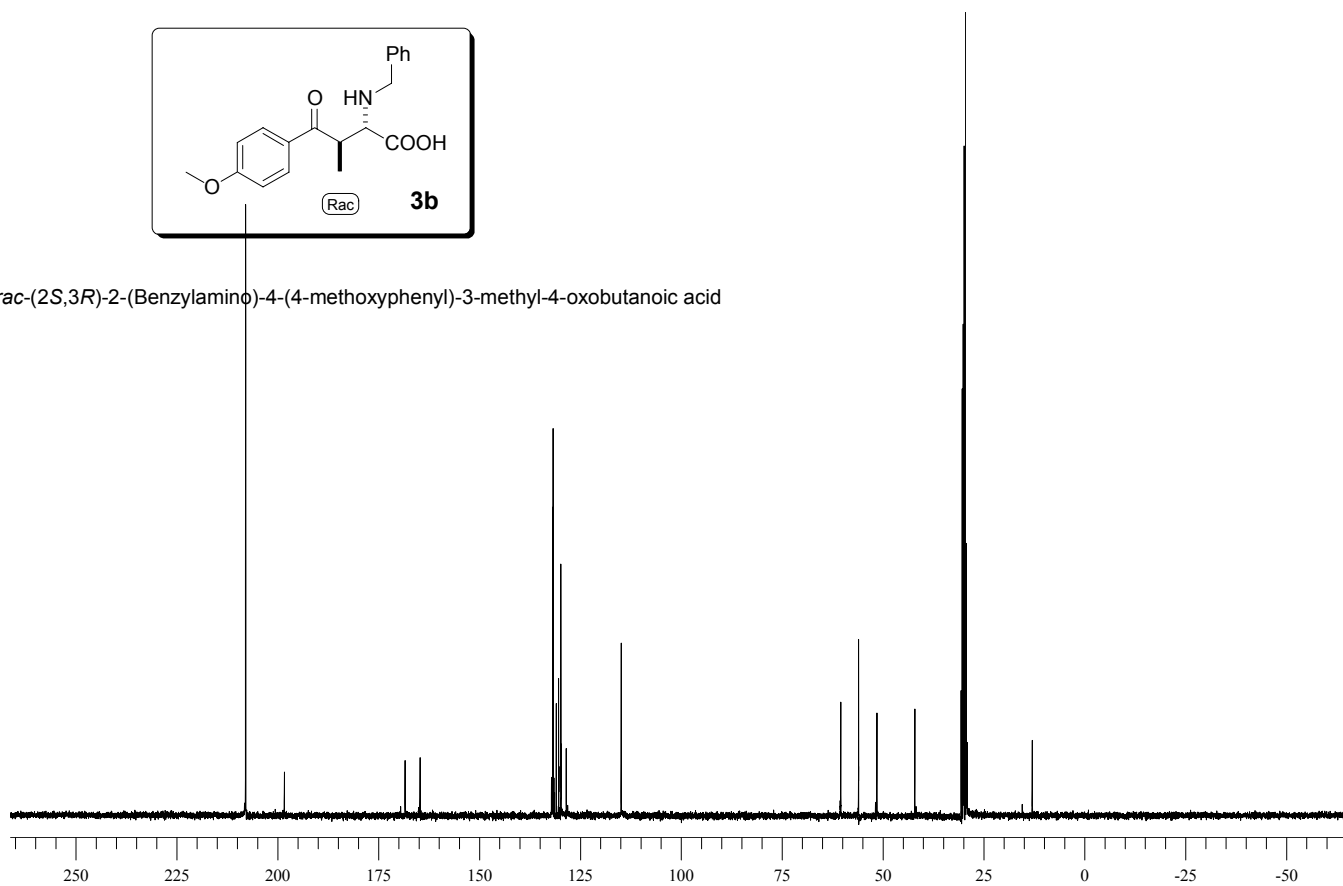

PJ 622-1H

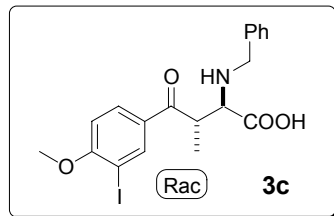

*rac*-(2*S*,3*R*)-2-(Benzylamino)-4-(3-iodo-4-methoxyphenyl)-3-methyl-4-oxobutanoic acid

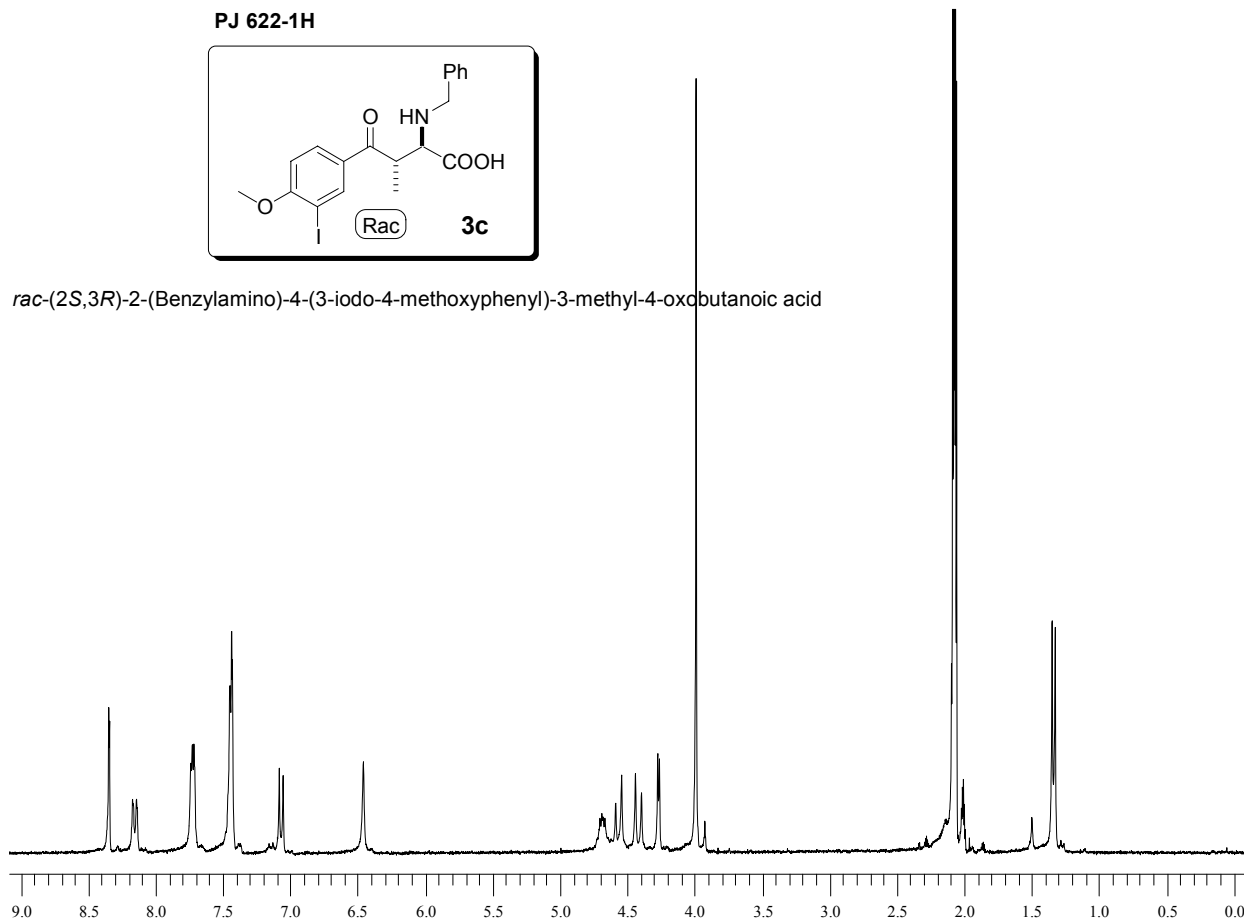

PJ 622

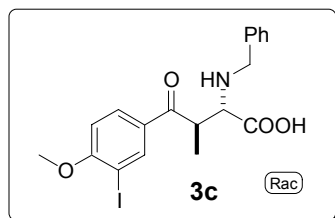

*rac*-(2*S*,3*R*)-2-(Benzylamino)-4-(3-iodo-4-methoxyphenyl)-3-methyl-4-oxobutanoic acid

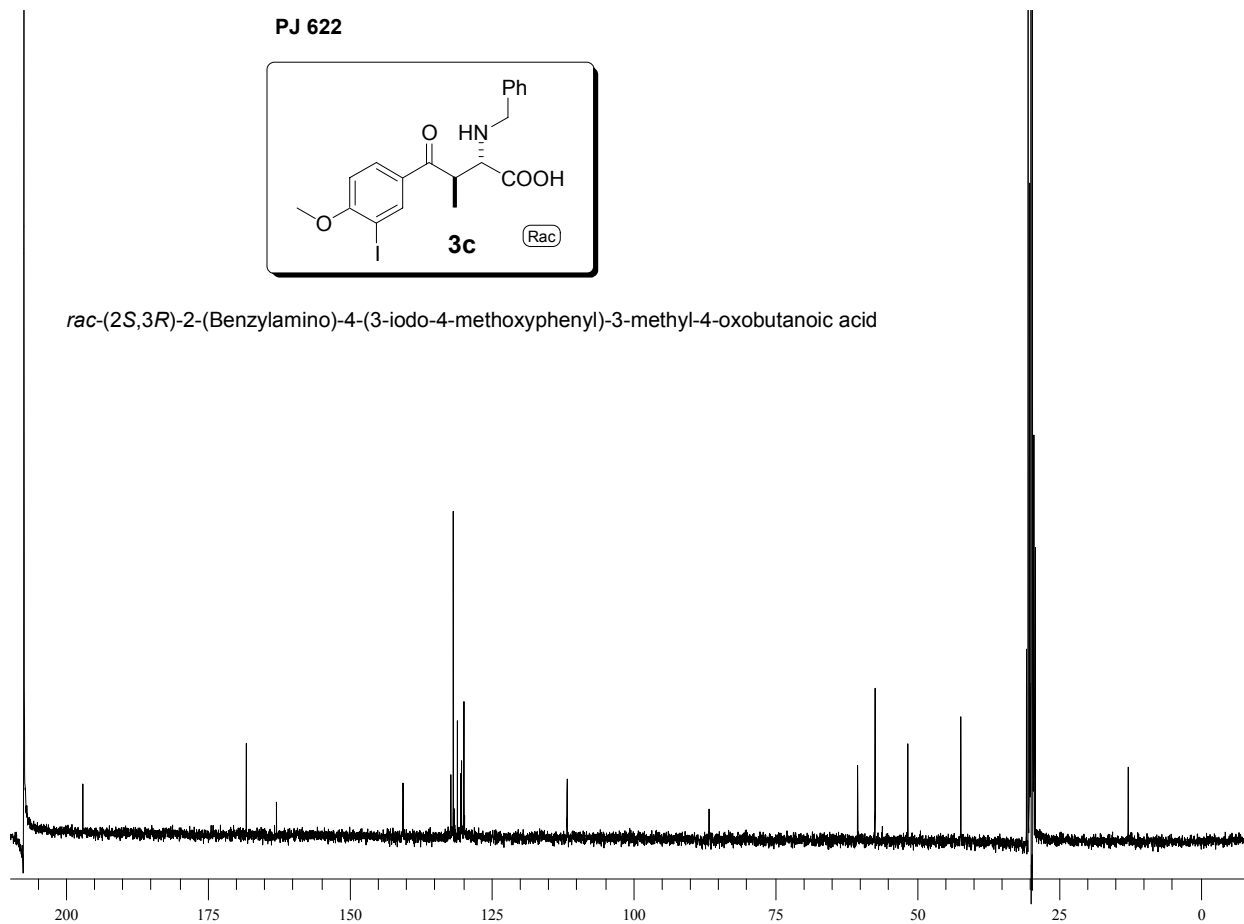



PJ 487

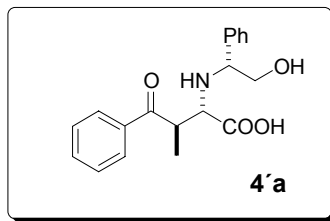

(2*S*,3*R*,1'*R*)-2-[(2''-Hydroxy-1''-phenylethyl)amino]-3-methyl-4-oxo-4-phenylbutanoic acid

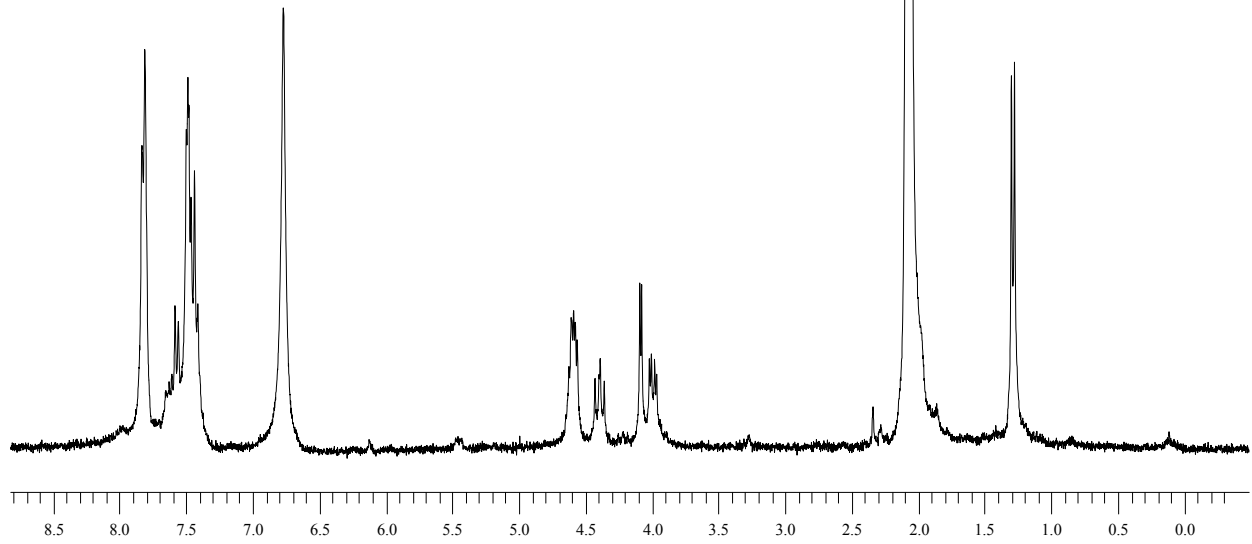

PJ 487

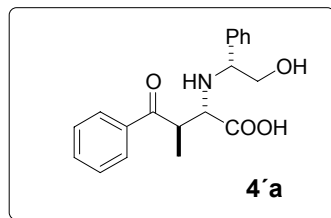

(2*S*,3*R*,1'*R*)-2-[(2''-Hydroxy-1''-phenylethyl)amino]-3-methyl-4-oxo-4-phenylbutanoic acid

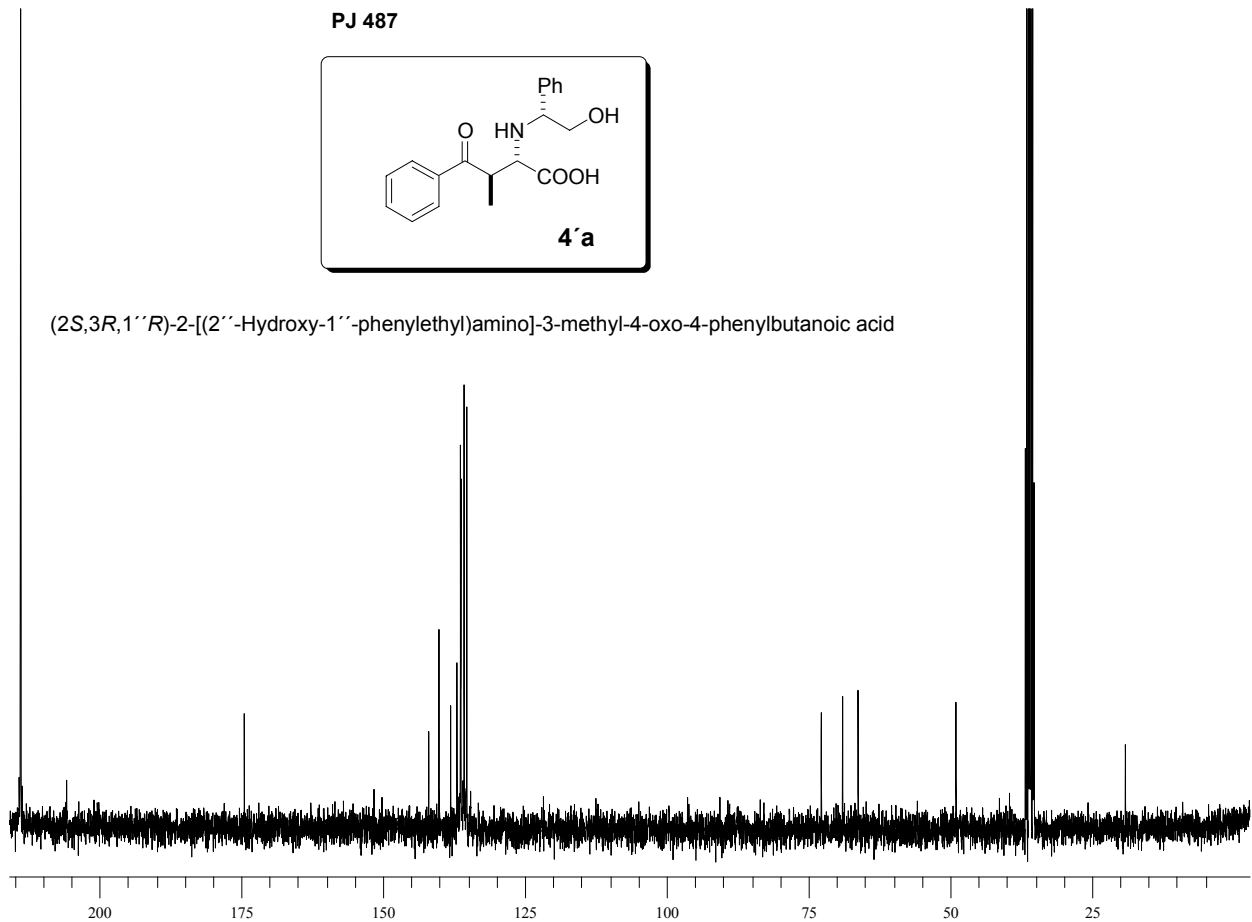

PJ 401

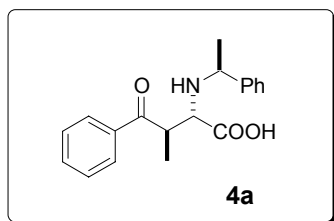

(2S,3R,1'S)-3-Methyl-4-oxo-4-phenyl-2-[(1'S)-phenylethyl]amino]butanoic acid

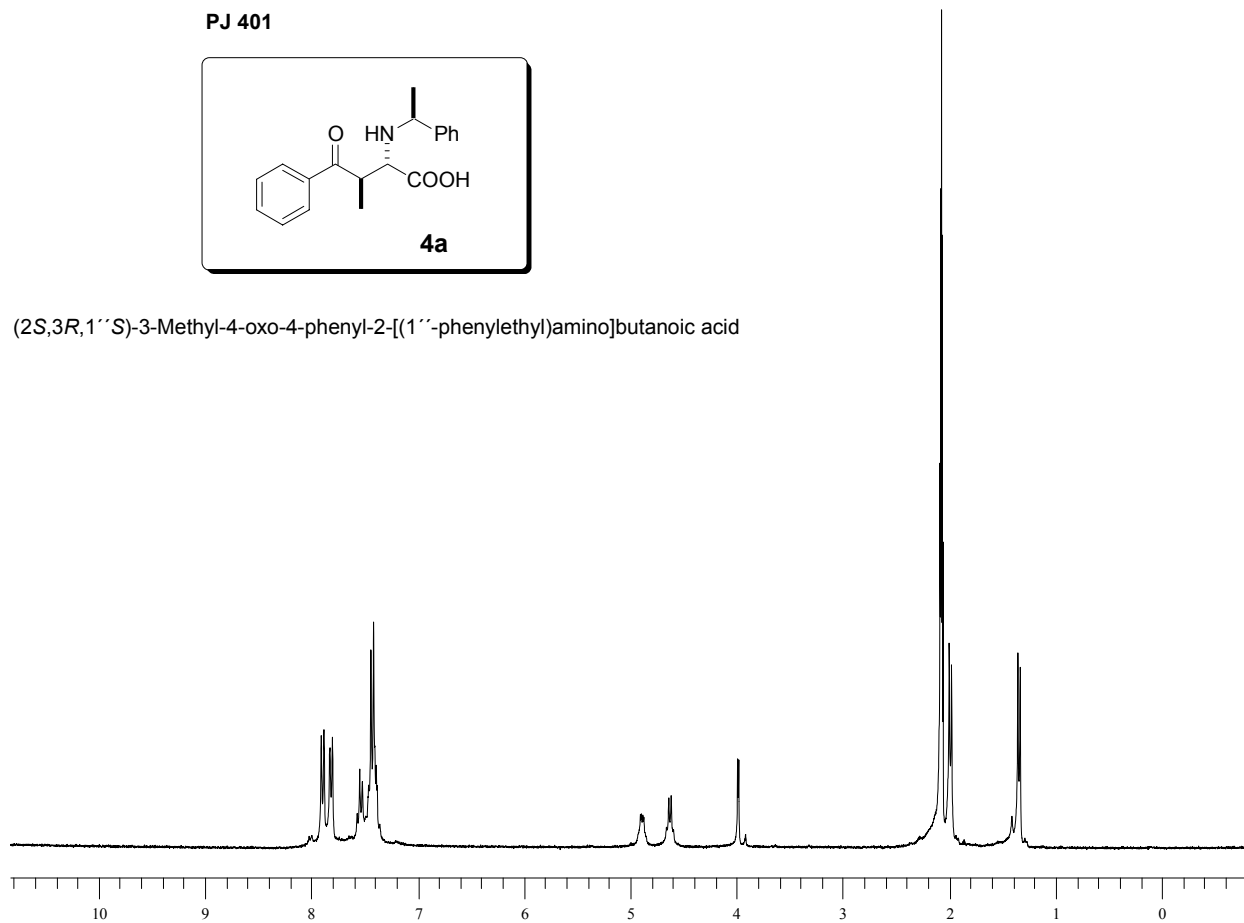

PJ 401

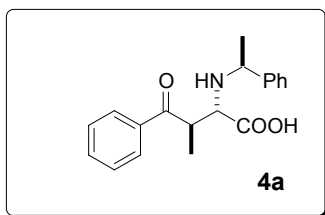

(2S,3R,1'S)-3-Methyl-4-oxo-4-phenyl-2-[(1'S)-phenylethyl]amino]butanoic acid

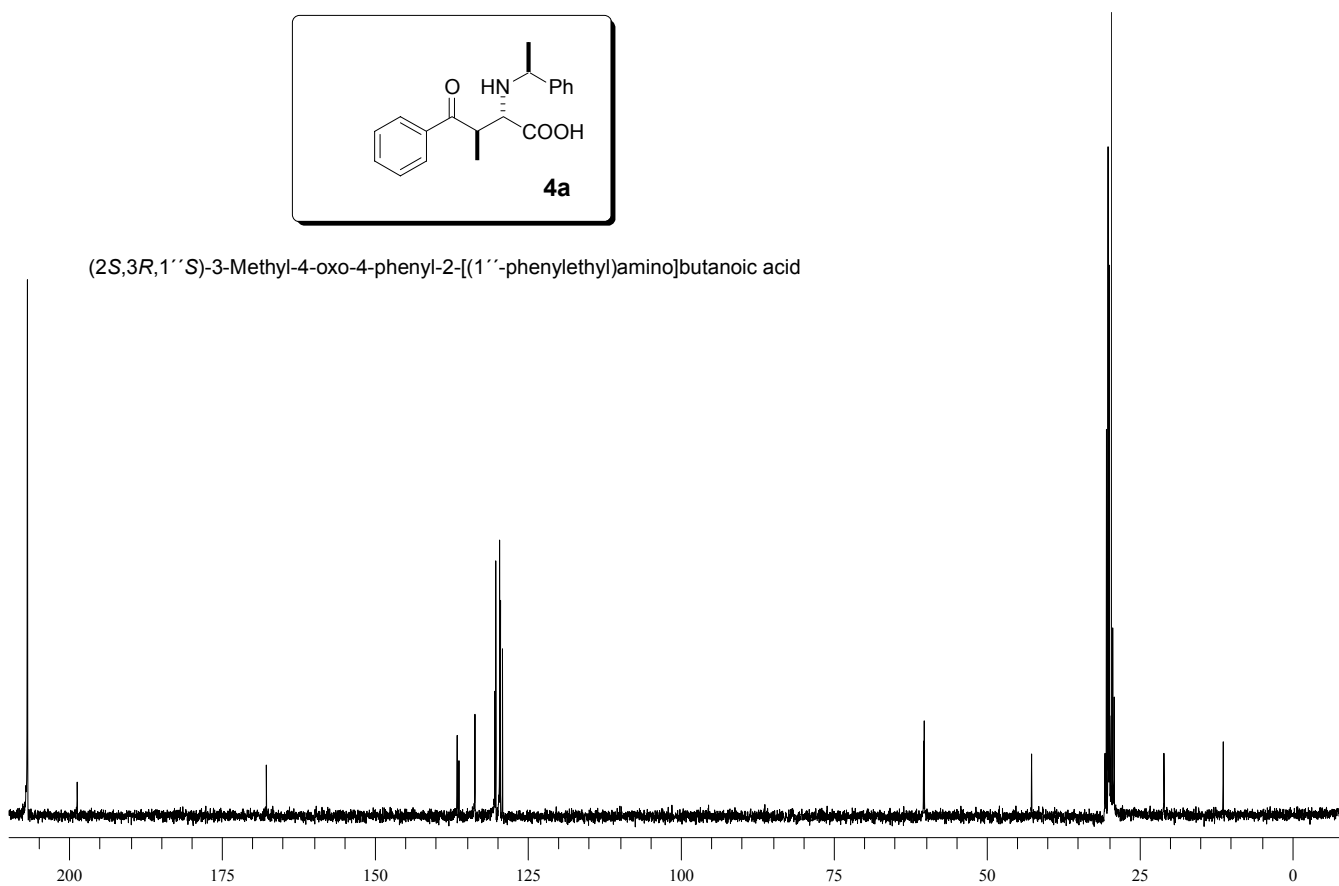

PJ 432

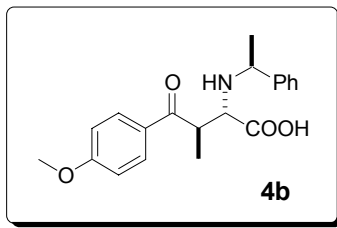

(2S,3R,1''S)-4-(4-Methoxyphenyl)-3-methyl-4-oxo-2-[(1''-phenylethyl)amino]butanoic acid

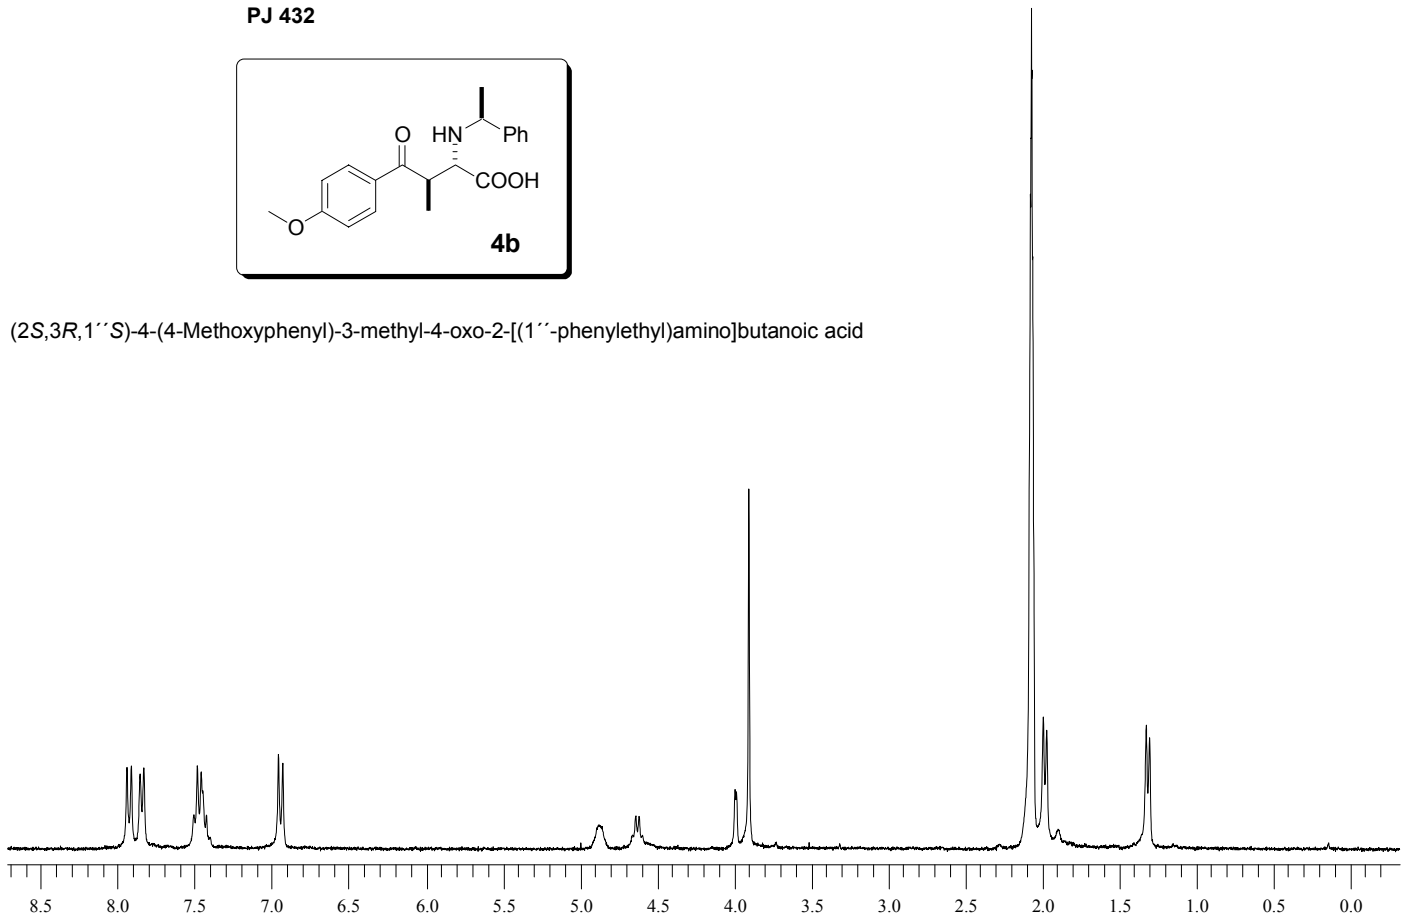

PJ 432

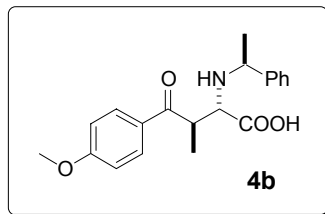

(2S,3R,1''S)-4-(4-Methoxyphenyl)-3-methyl-4-oxo-2-[(1''-phenylethyl)amino]butanoic acid

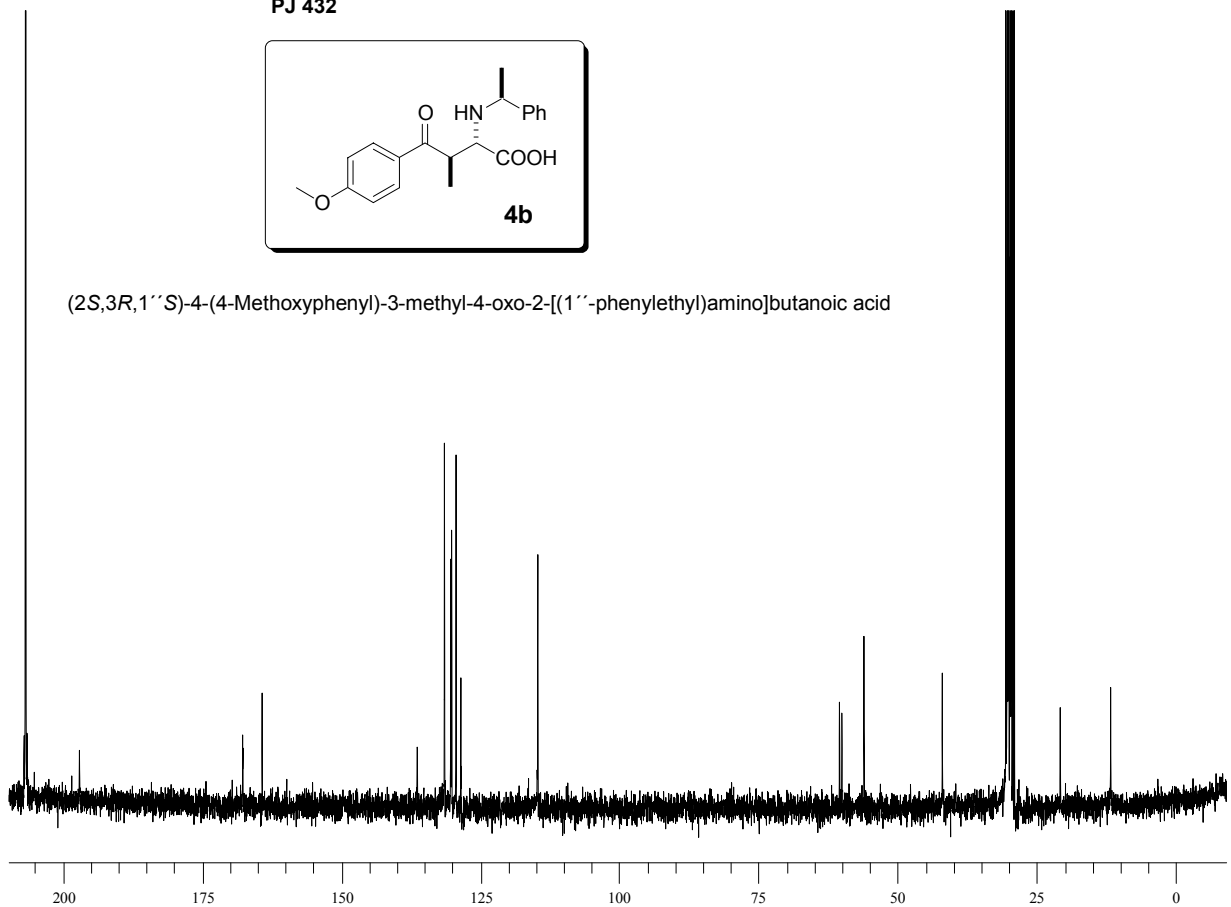

DW 185

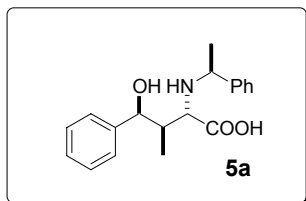

(2S,3R,4S,1''S)-4-Hydroxy-3-methyl-4-phenyl-2-[(1''-phenylethyl)amino]butanoic acid

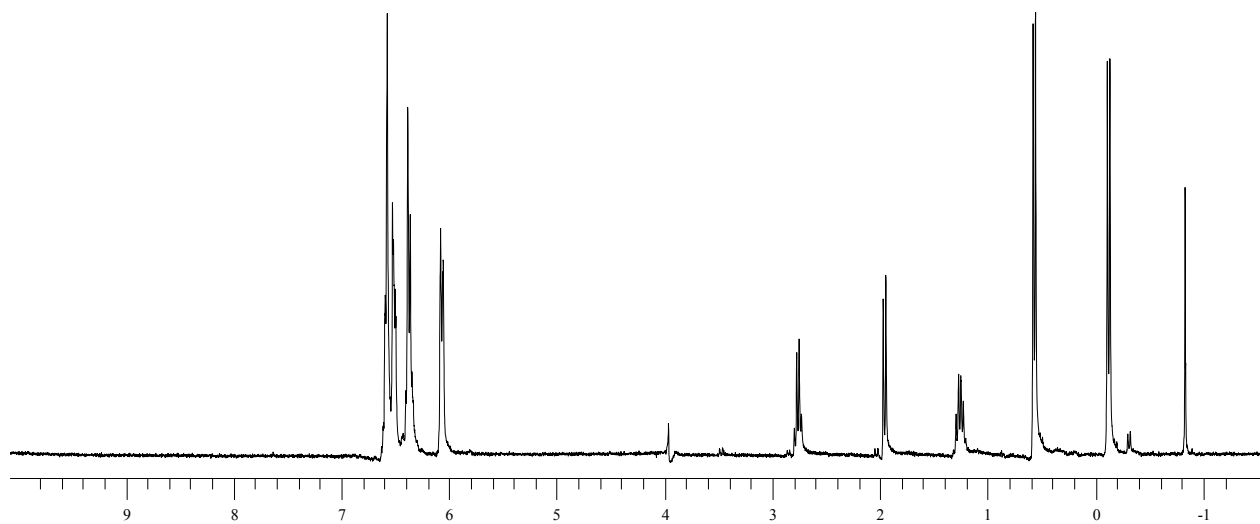

DW 185

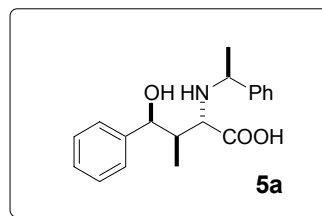

(2S,3R,4S,1''S)-4-Hydroxy-3-methyl-4-phenyl-2-[(1''-phenylethyl)amino]butanoic acid

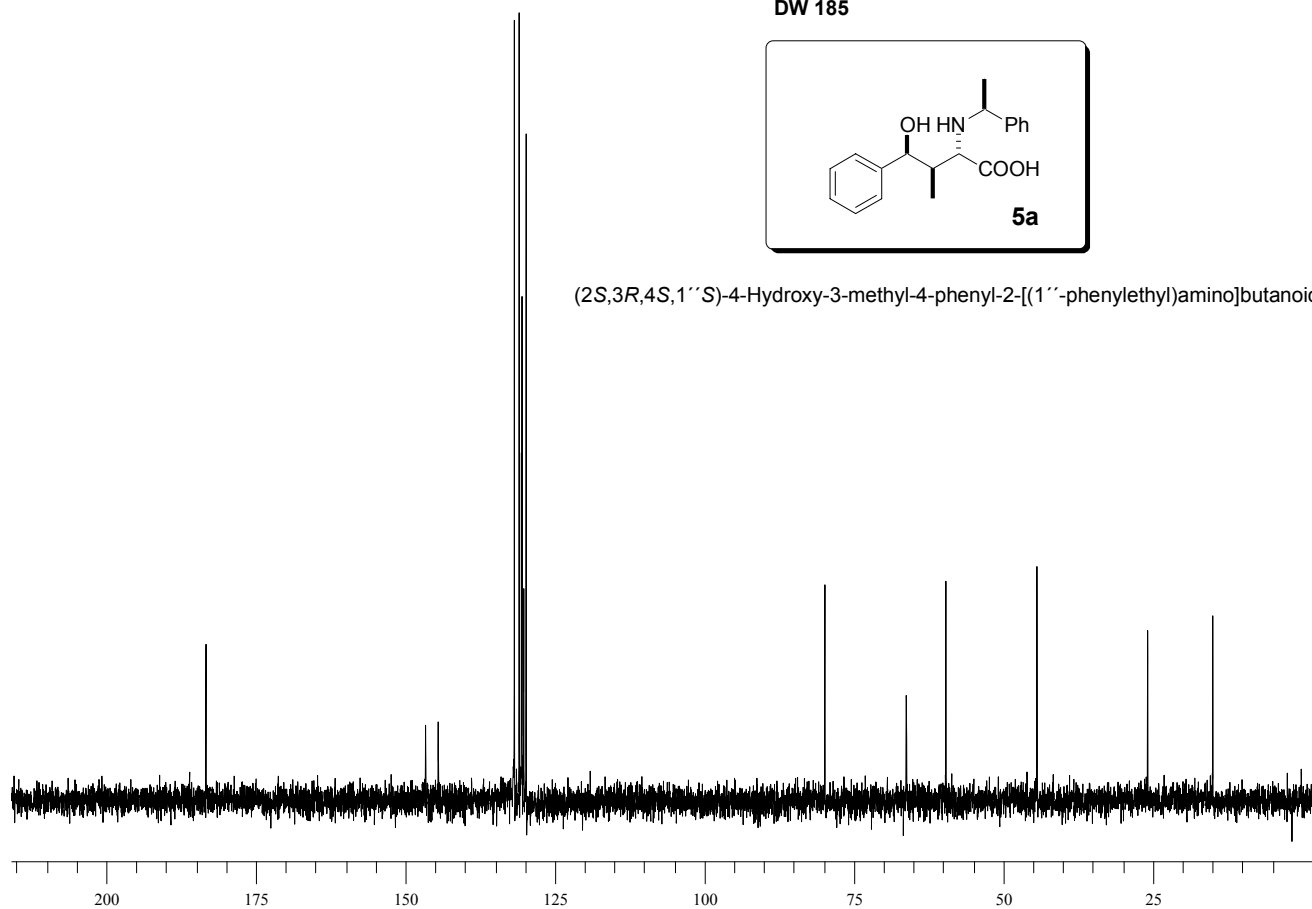

DW 106

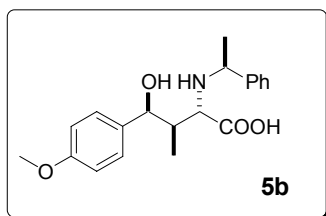

(2S,3R,4S,1''S)-4-Hydroxy-4-(4-methoxyphenyl)-3-methyl-2-[(1''-phenylethyl)amino]butanoic acid

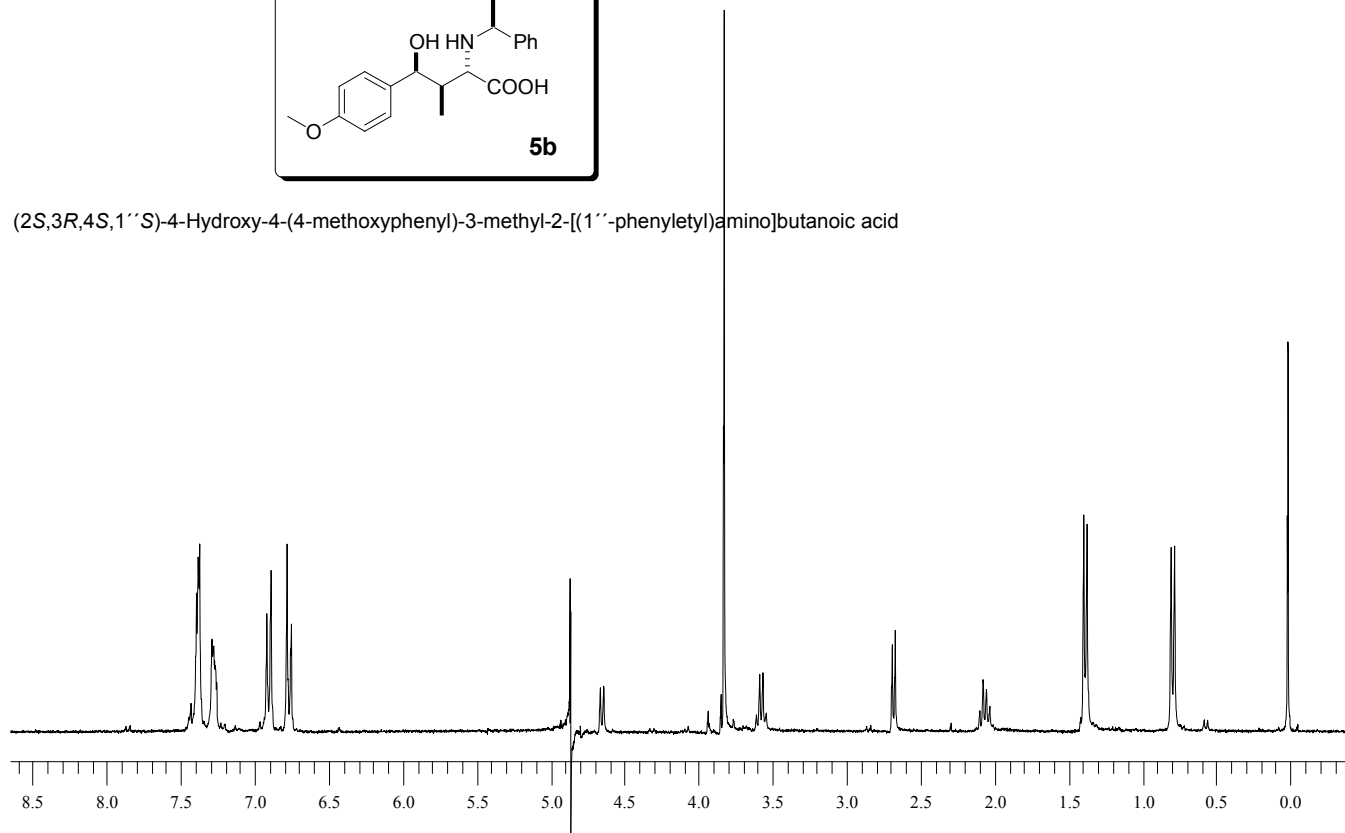

DW 106

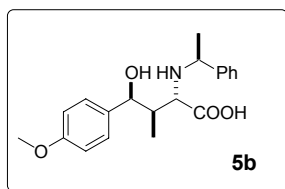

(2S,3R,4S,1''S)-4-Hydroxy-4-(4-methoxyphenyl)-3-methyl-2-[(1''-phenylethyl)amino]butanoic acid

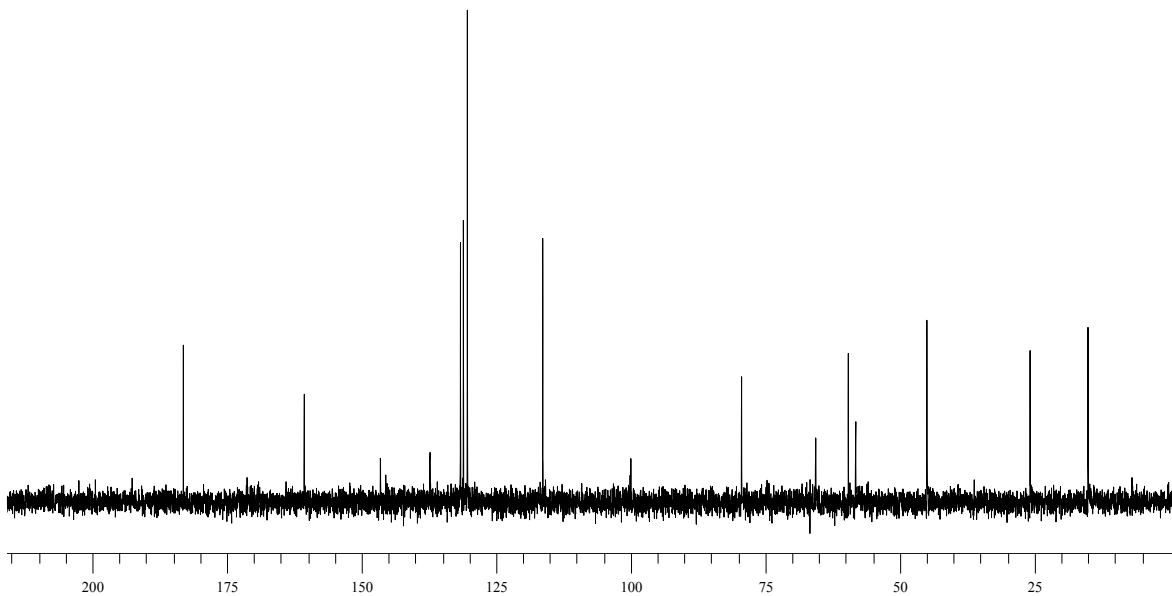

DW 102

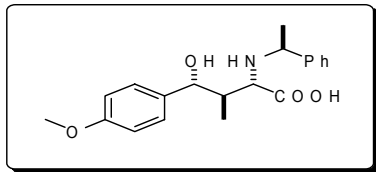

<sup>1</sup>H-NMR

(2*S*,3*R*,4*R*)-2-((*S*)-1-phenylethylamino)-4-hydroxy-4-(4-methoxyphenyl)-3-methylbutanoic acid

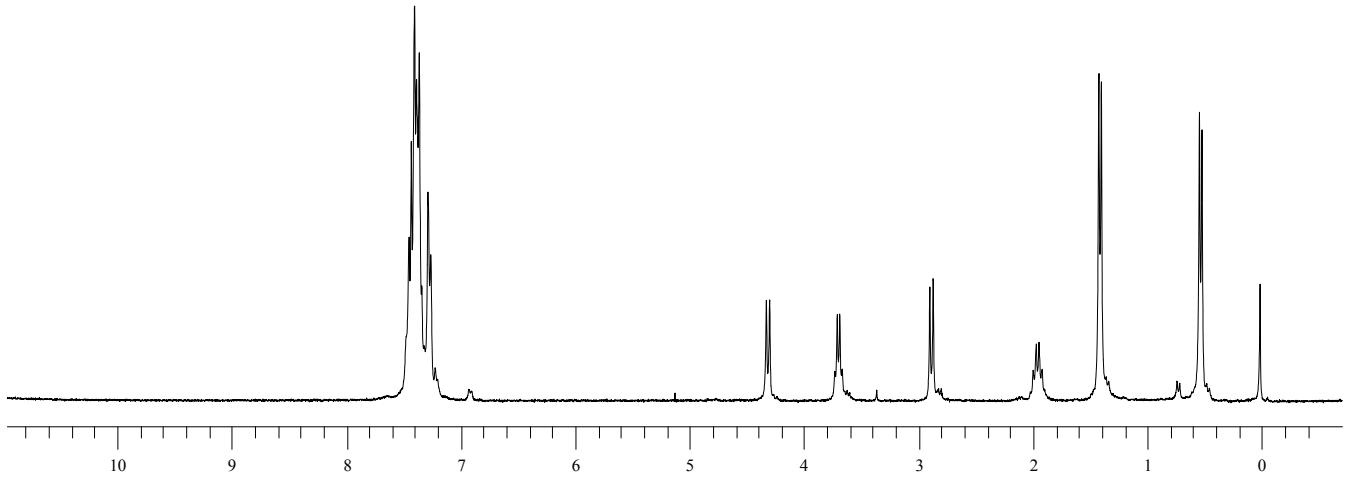

DW 102

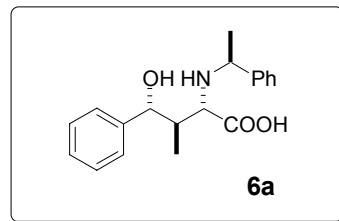

(2*S*,3*R*,4*R*,1''*S*)-4-Hydroxy-3-methyl-4-phenyl-2-[(1''-phenylethyl)amino]butanoic acid

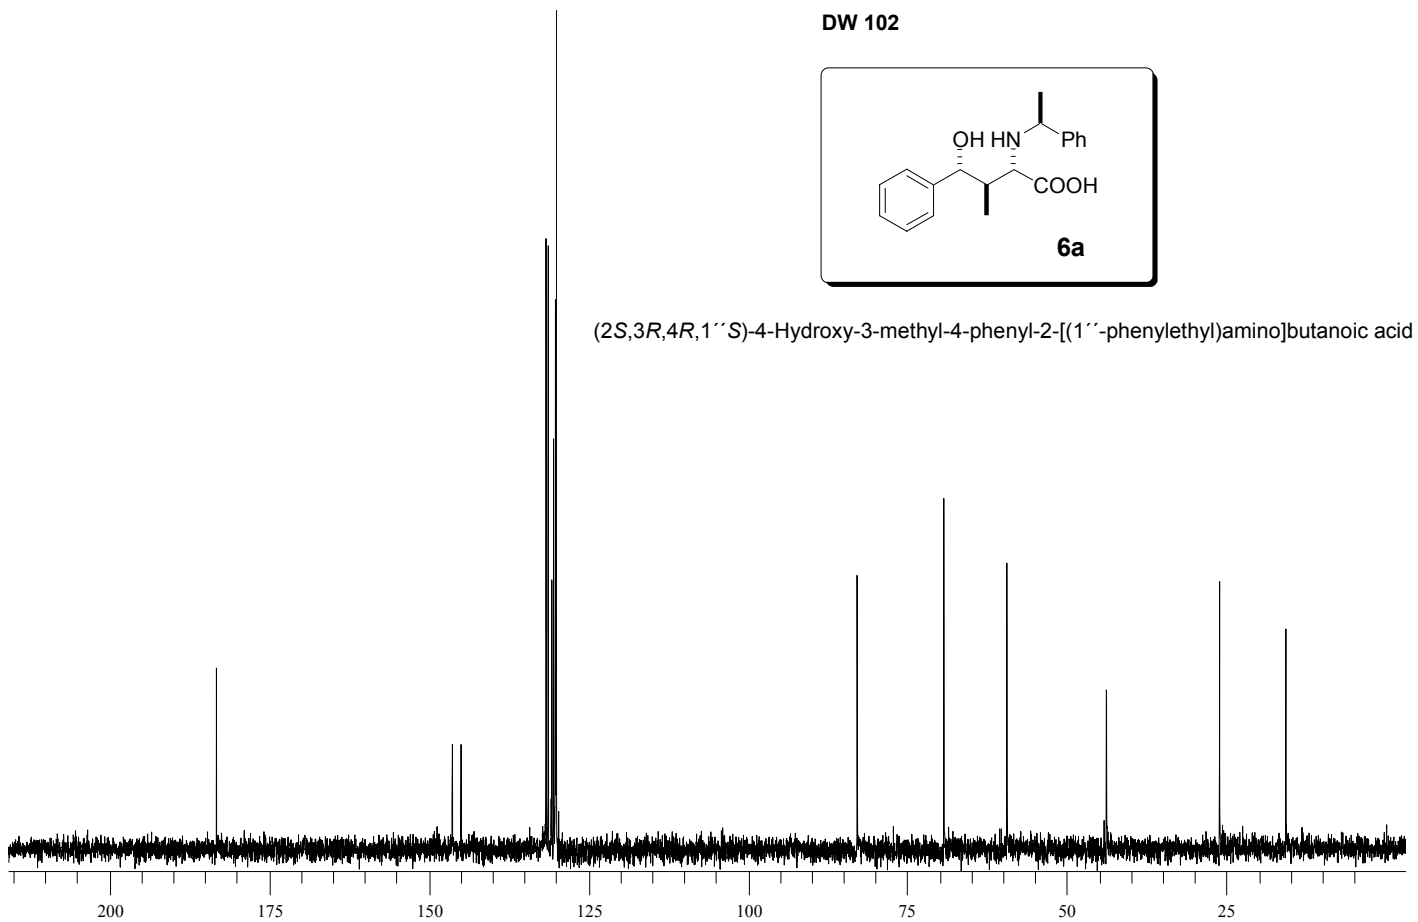

DW 96

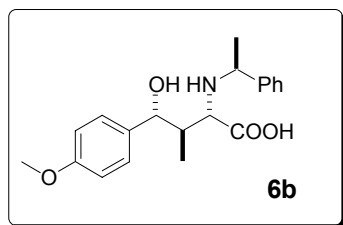

(2*S*,3*R*,4*R*,1''*S*)-4-Hydroxy-4-(4-methoxyphenyl)-3-methyl-2-[(1''-phenylethyl)amino]butanoic acid

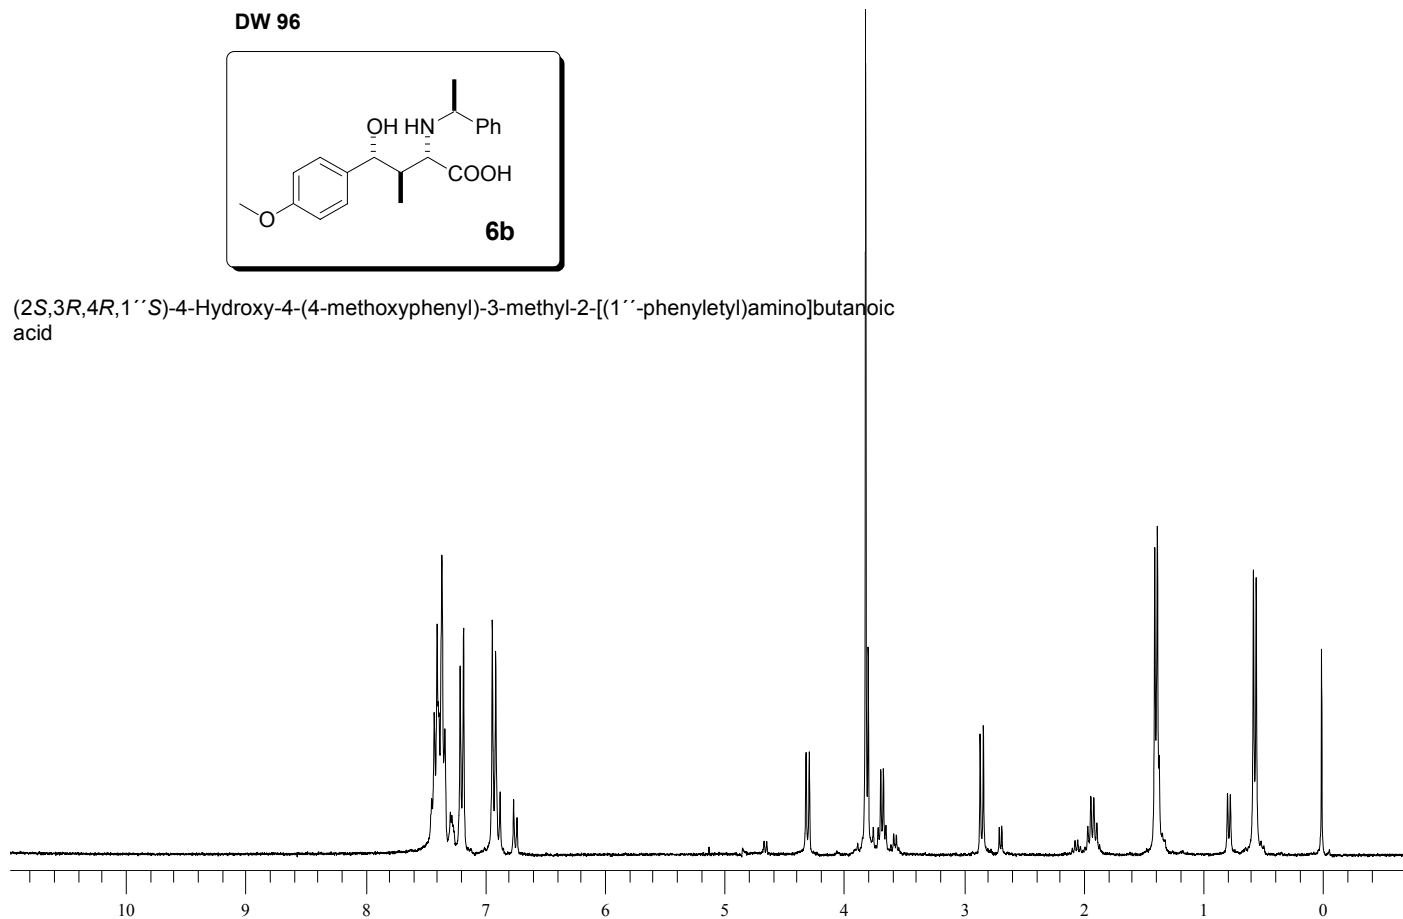

DW 96

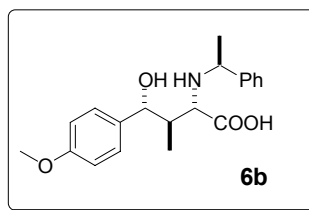

(2*S*,3*R*,4*R*,1''*S*)-4-Hydroxy-4-(4-methoxyphenyl)-3-methyl-2-[(1''-phenylethyl)amino]butanoic acid

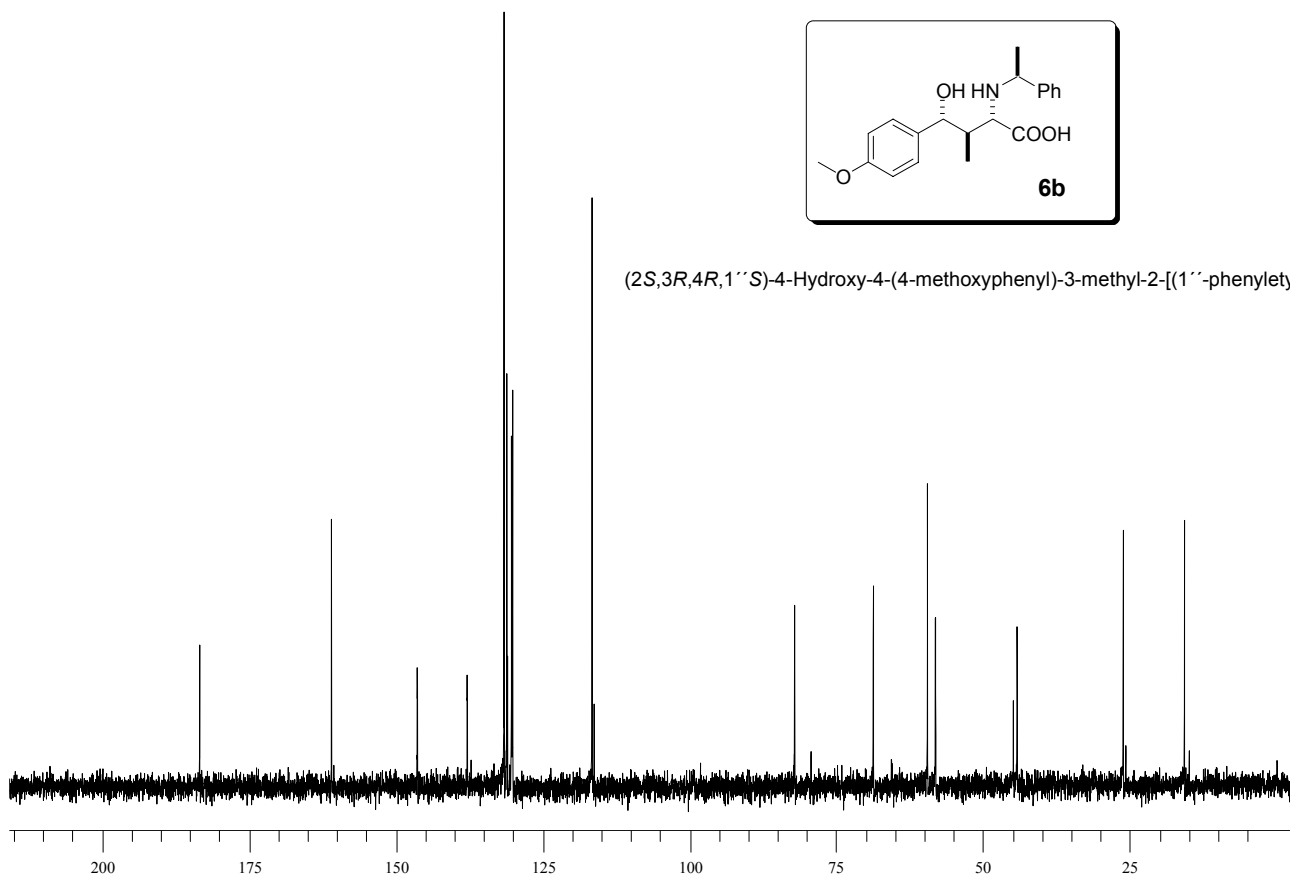

DW 189

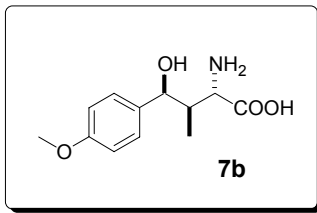

(2S,3R,4S)-2-amino-4-hydroxy-4-(4-methoxyphenyl)-3-methylbutanoic acid

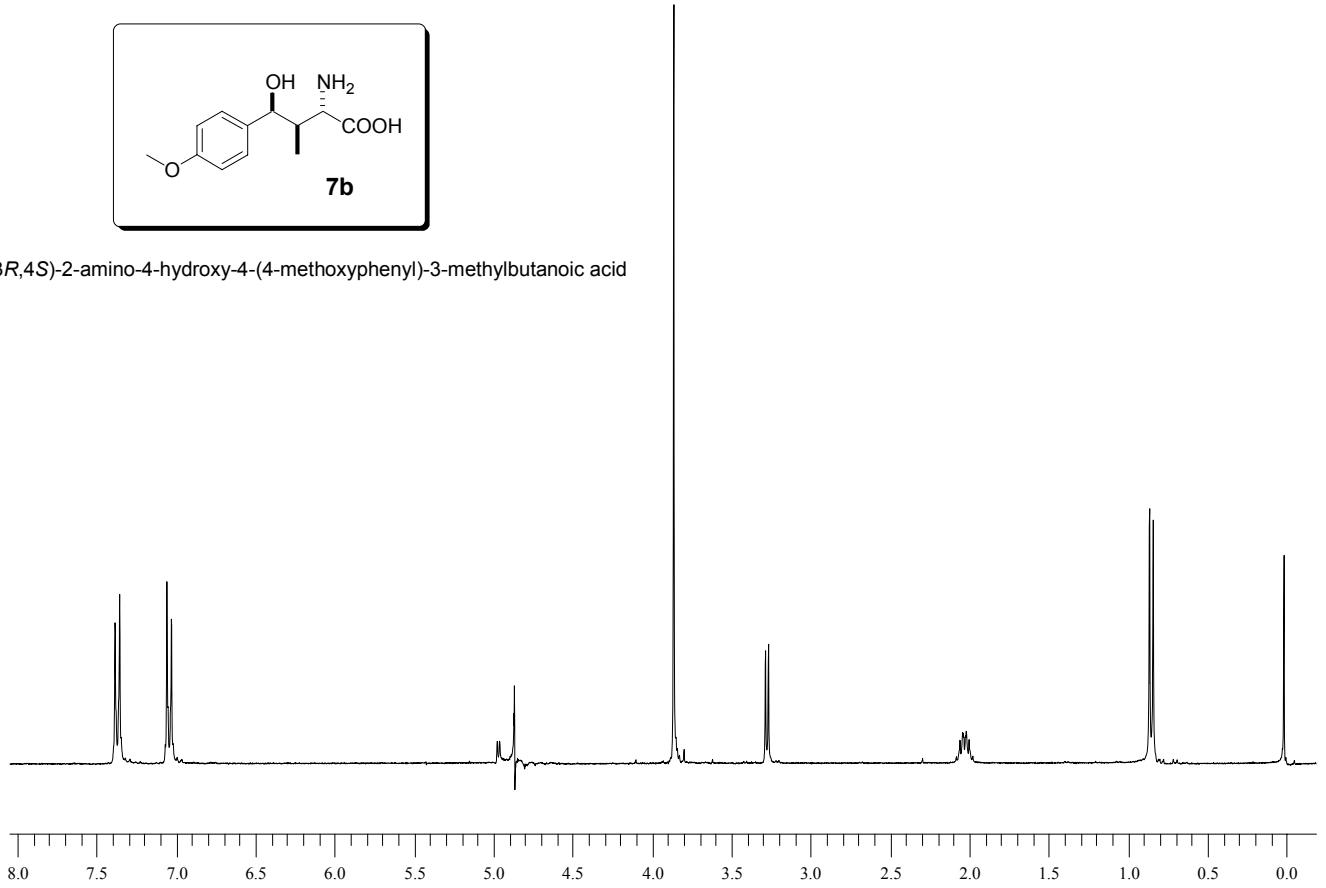

DW 189

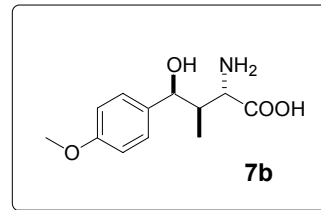

(2S,3R,4S)-2-amino-4-hydroxy-4-(4-methoxyphenyl)-3-methylbutanoic acid

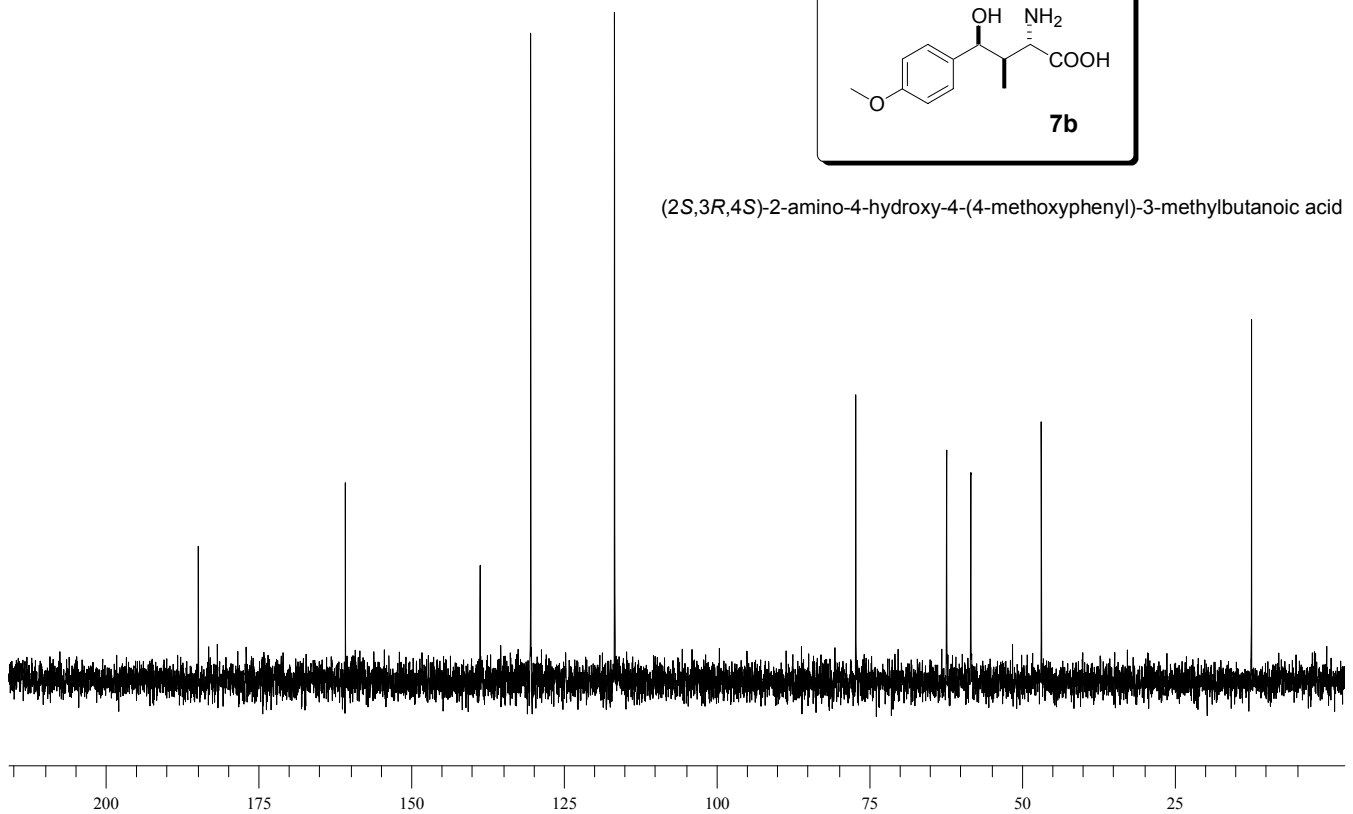



DW 188

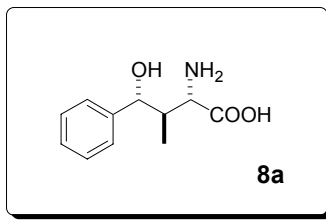

(2S,3R,4R)-2-Amino-4-hydroxy-3-methyl-4-phenylbutanoic acid

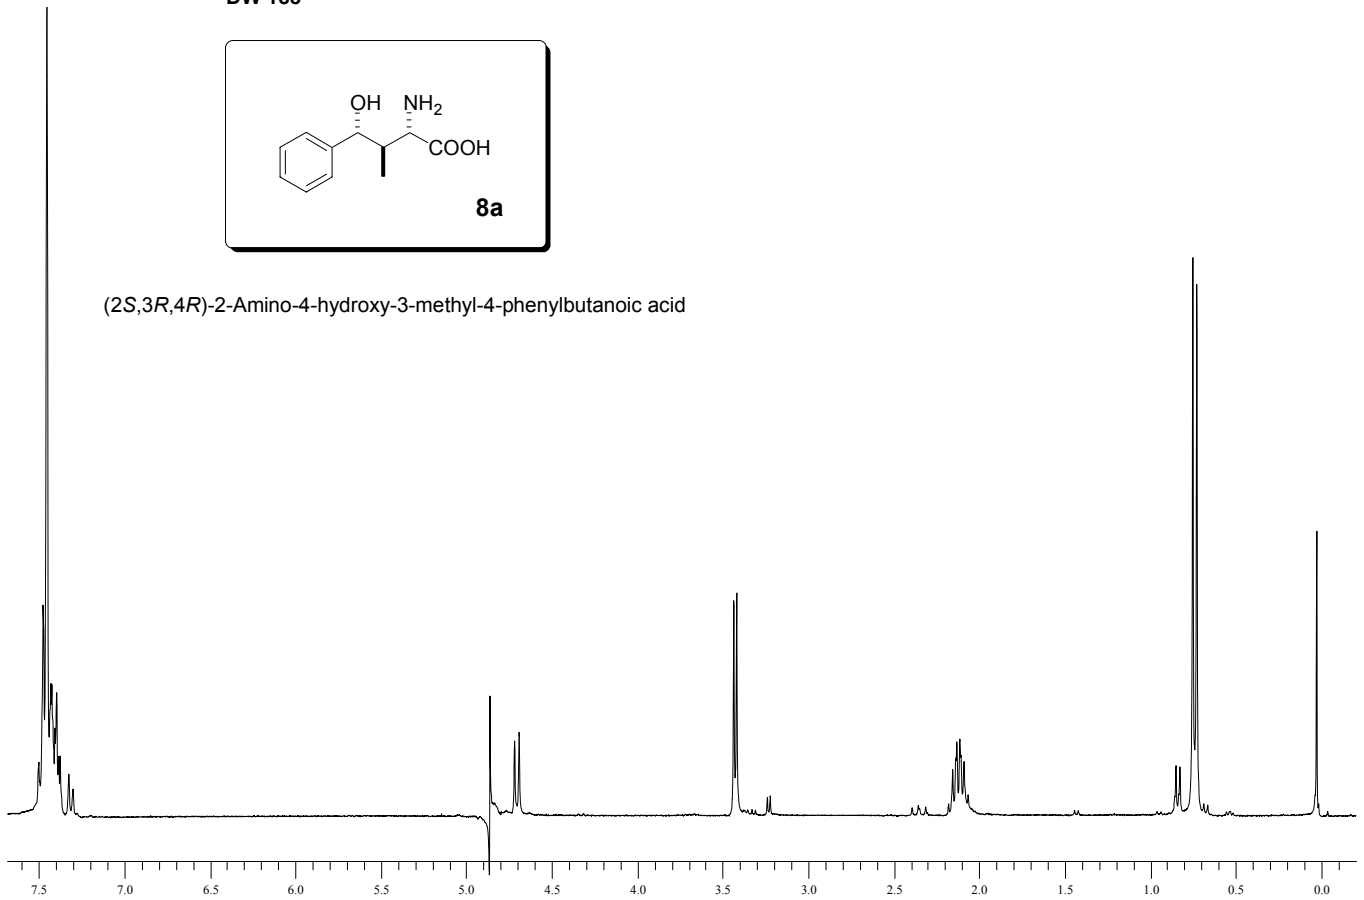

DW 188

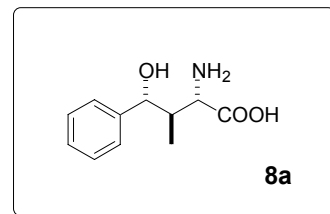

(2S,3R,4R)-2-Amino-4-hydroxy-3-methyl-4-phenylbutanoic acid

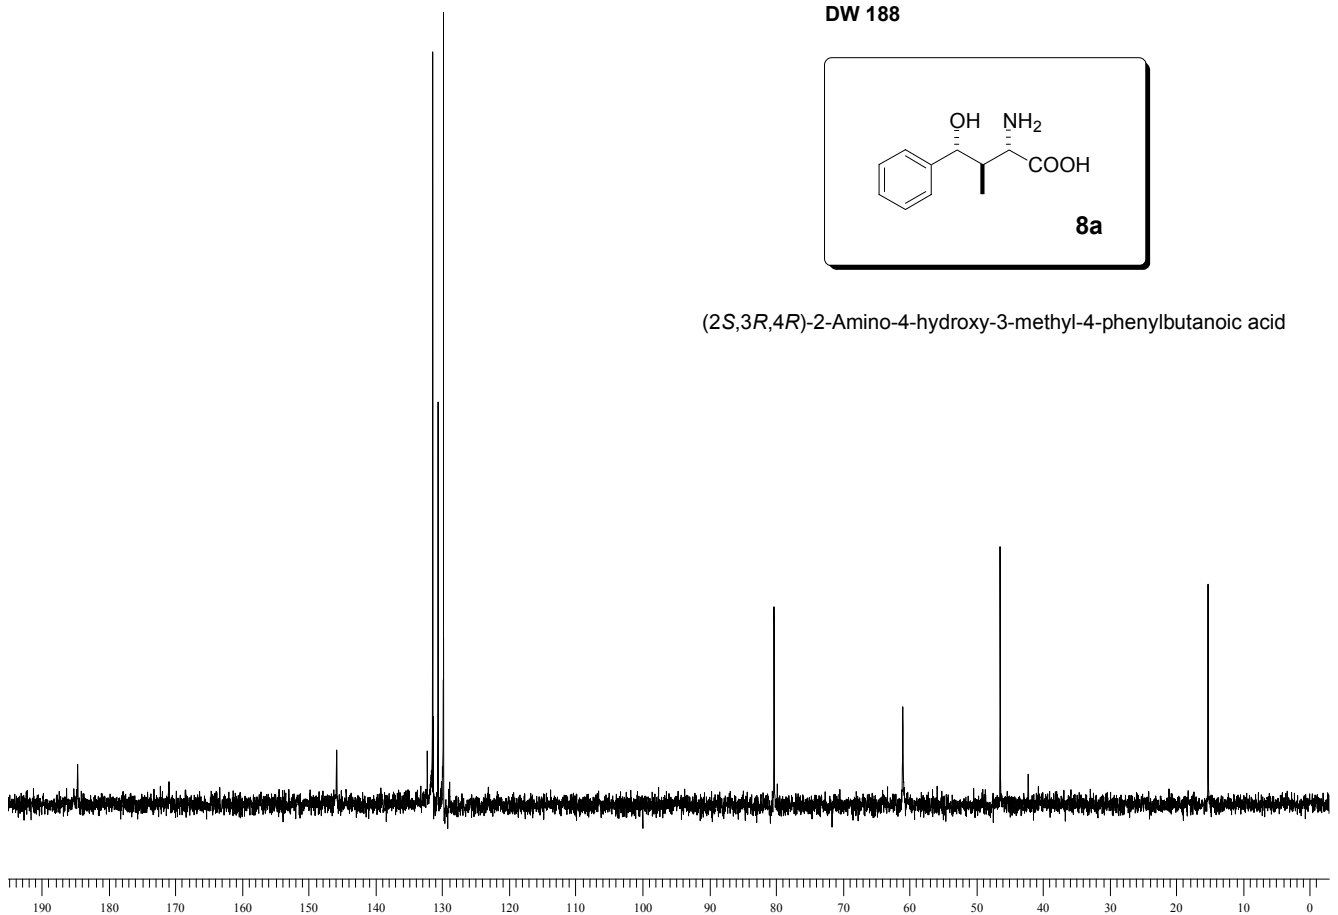

DW 175

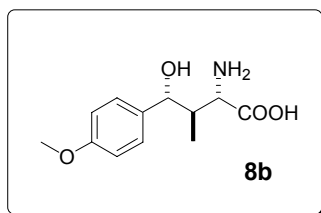

(2*S*,3*R*,4*R*)-2-amino-4-hydroxy-4-(4-methoxyphenyl)-3-methylbutanoic acid

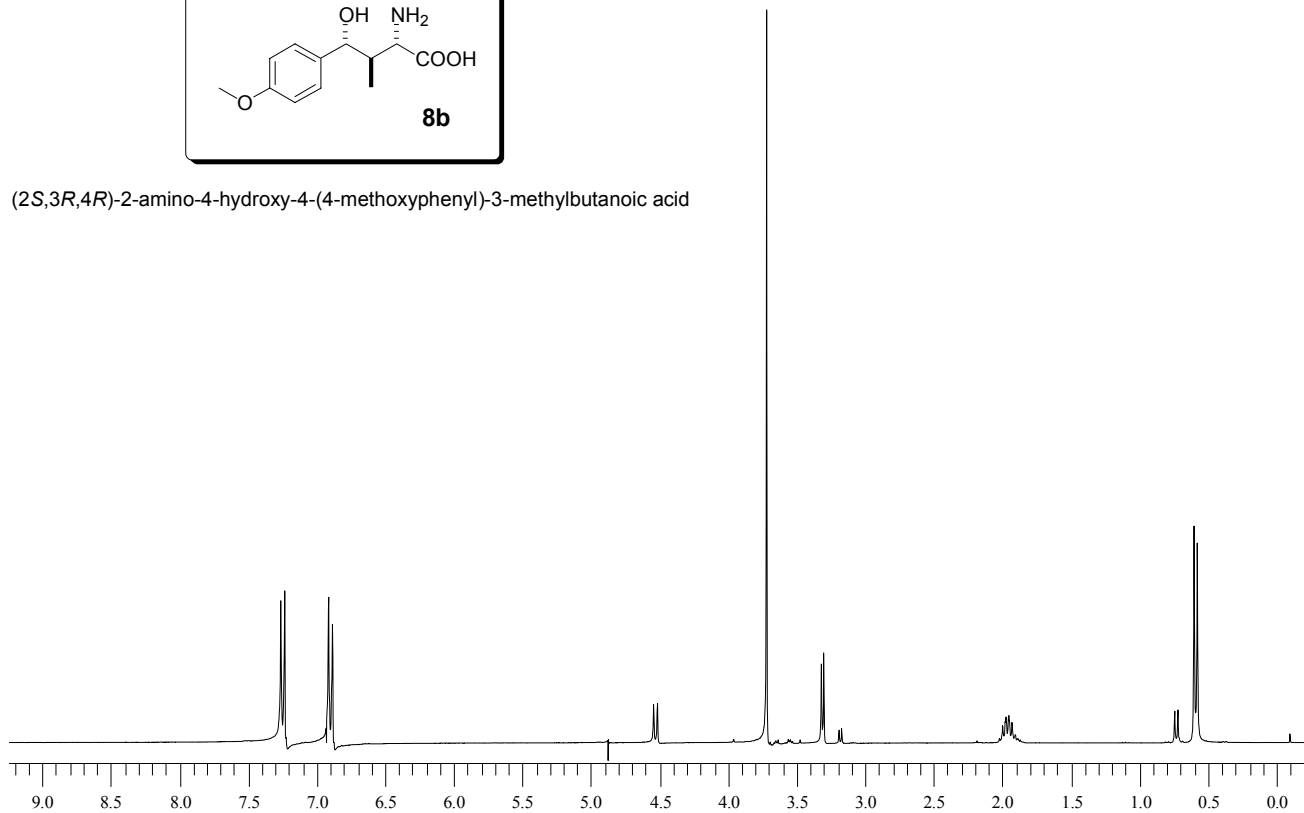

DW 175

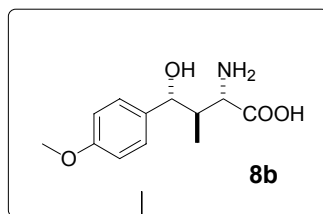

(2*S*,3*R*,4*R*)-2-amino-4-hydroxy-4-(4-methoxyphenyl)-3-methylbutanoic acid

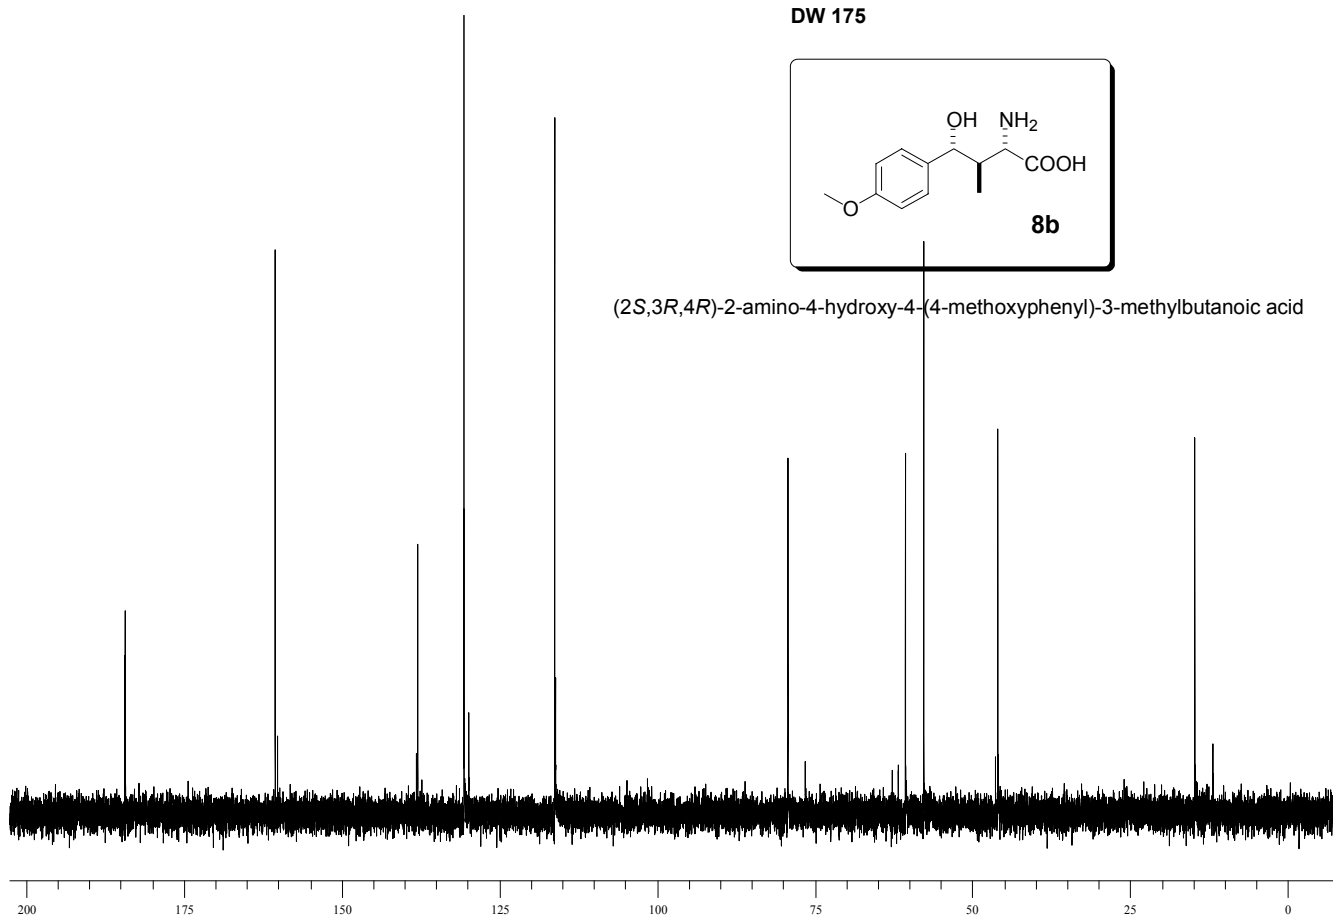

PJ 480

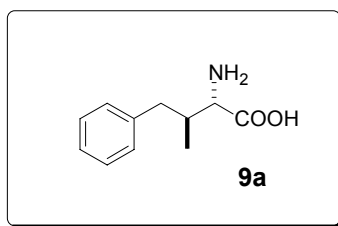

(2*S*,3*R*)-2-Amino-3-metyl-4-phenylbutanoic acid

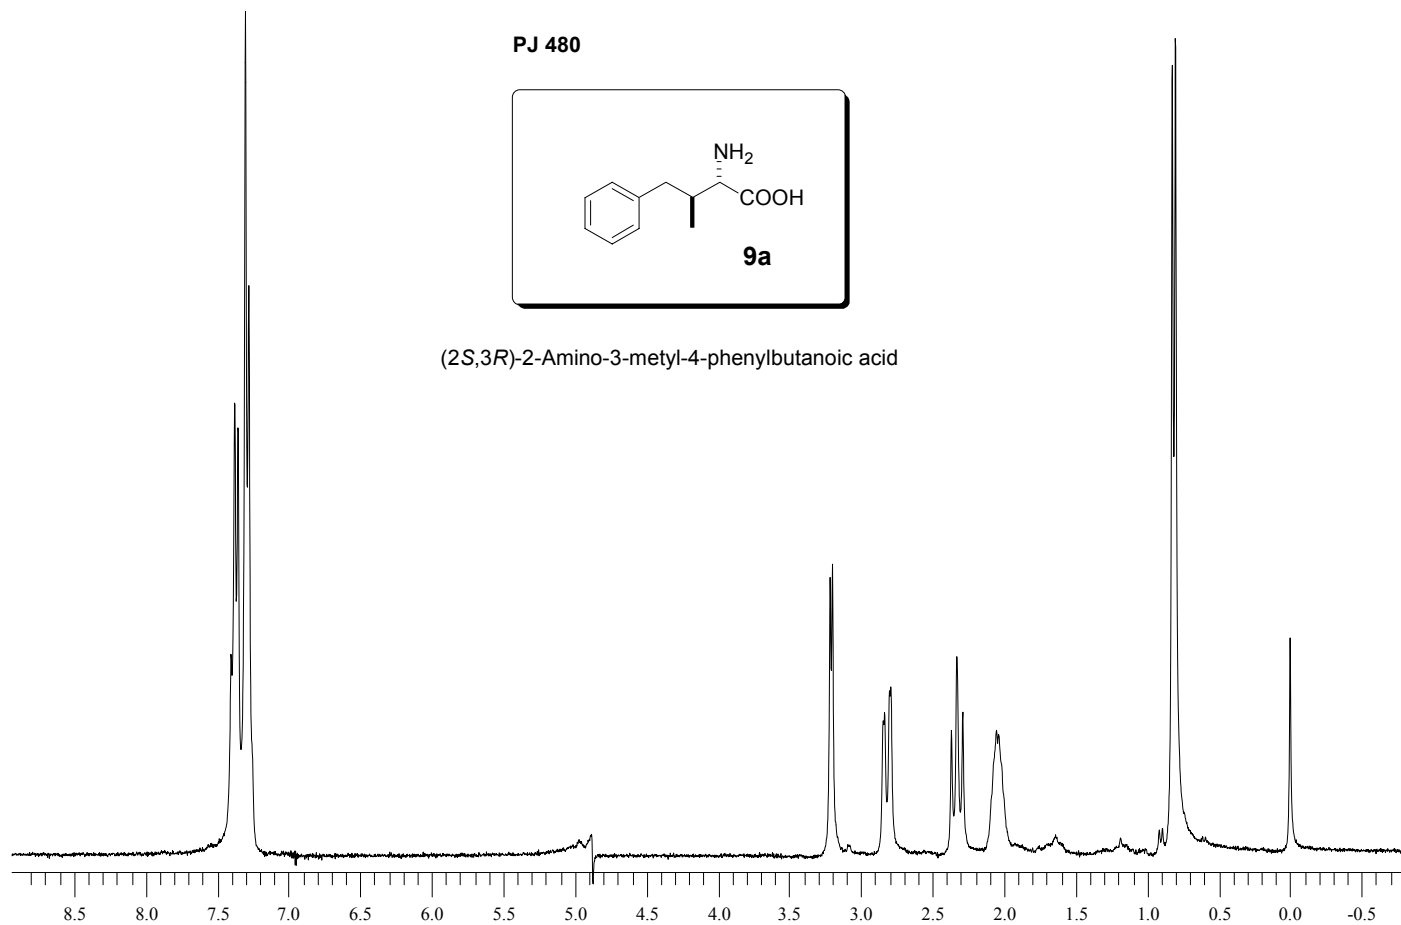

PJ 480

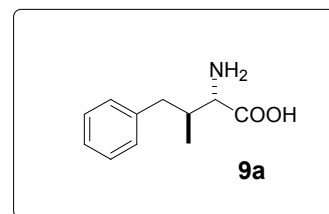

(2*S*,3*R*)-2-Amino-3-metyl-4-phenylbutanoic acid

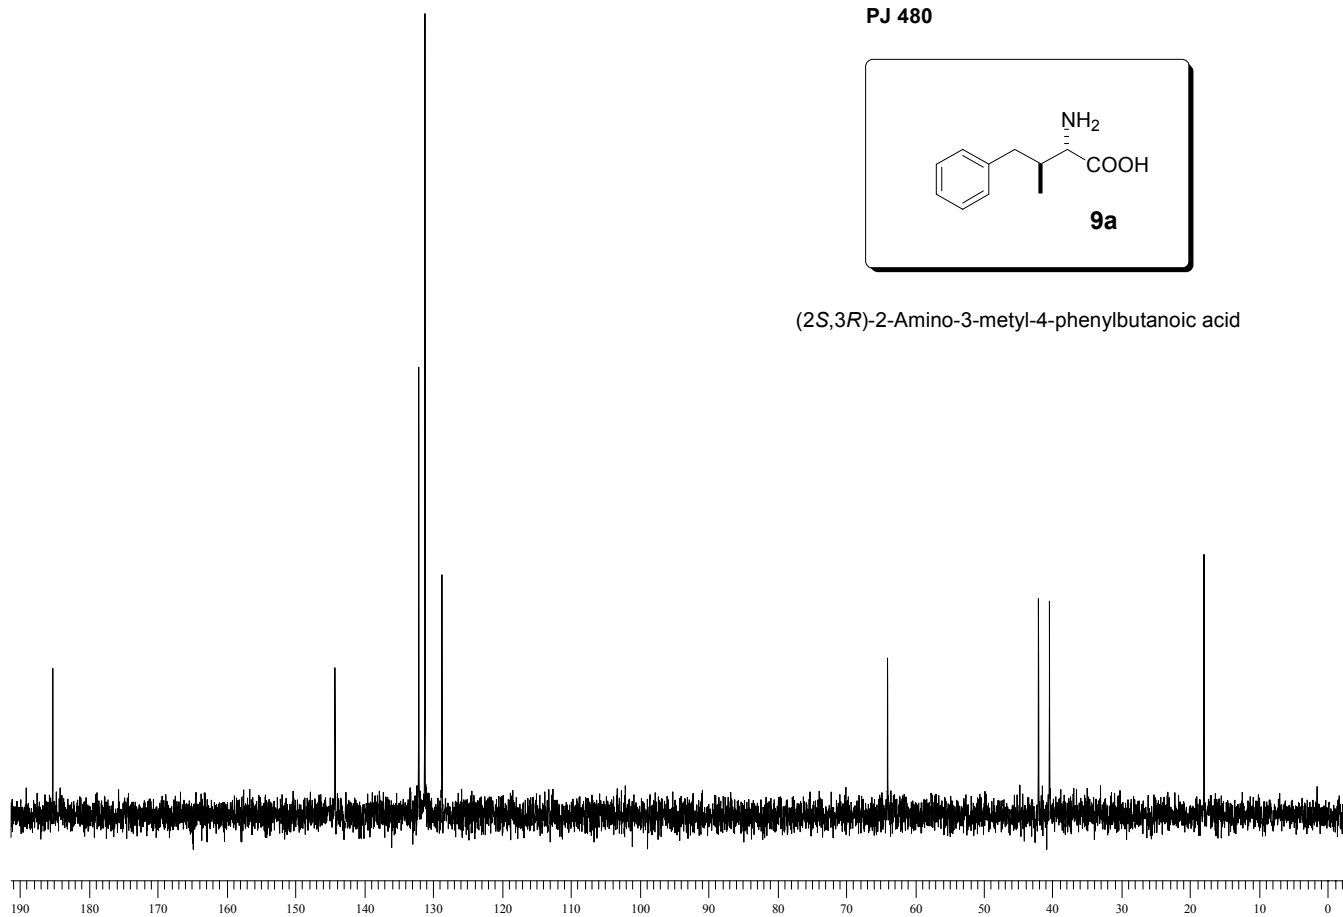

DW 119

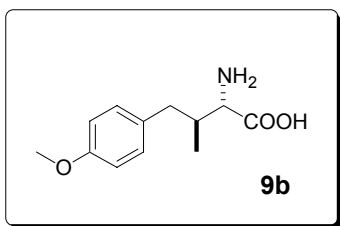

(2S,3R)-2-Amino-4-(4-methoxyphenyl)-3-methylbutanoic acid

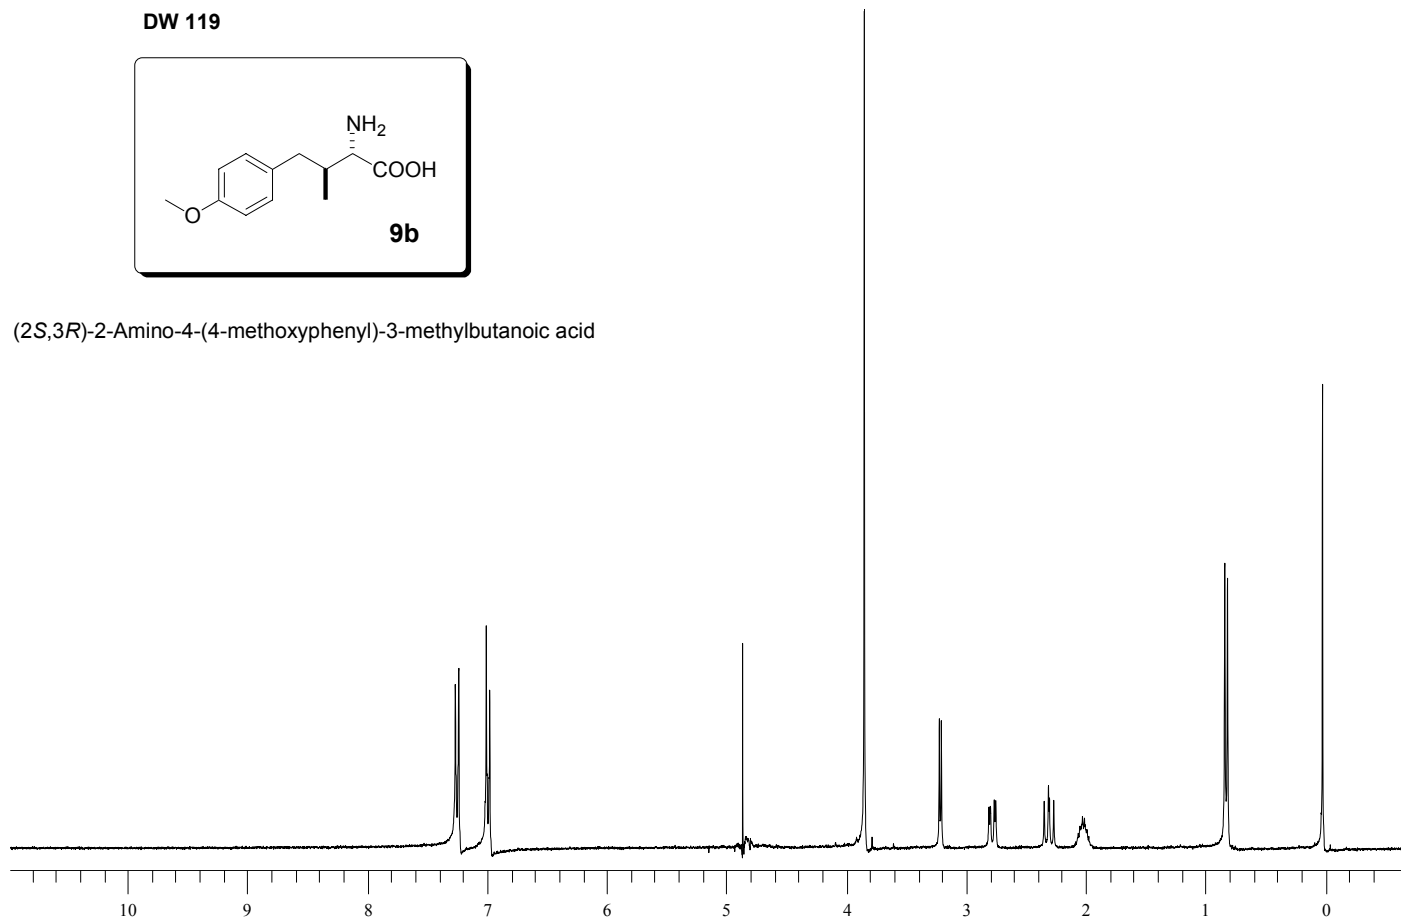

DW 119

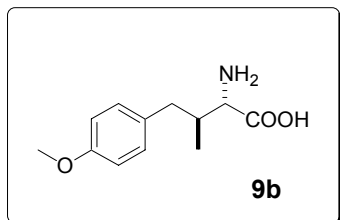

(2S,3R)-2-Amino-4-(4-methoxyphenyl)-3-methylbutanoic acid

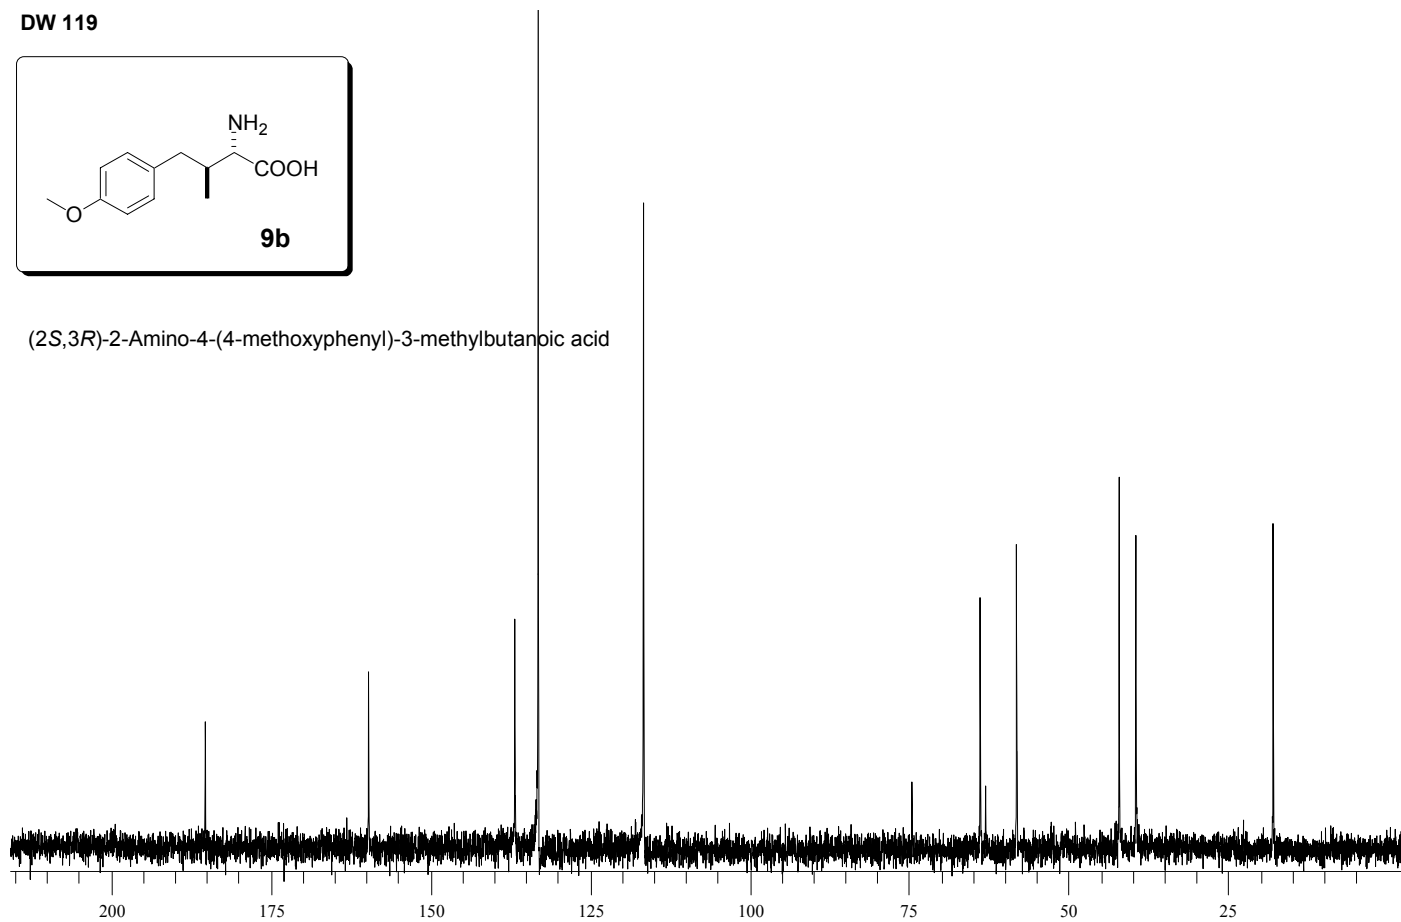

DW 103

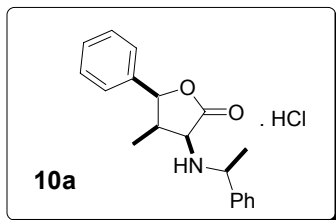

(3S,4R,5S,1''S)-4-Methyl-5-phenyl-3-(1''-phenylethylamino) dihydrofuran-2(3H)-one hydrochloride

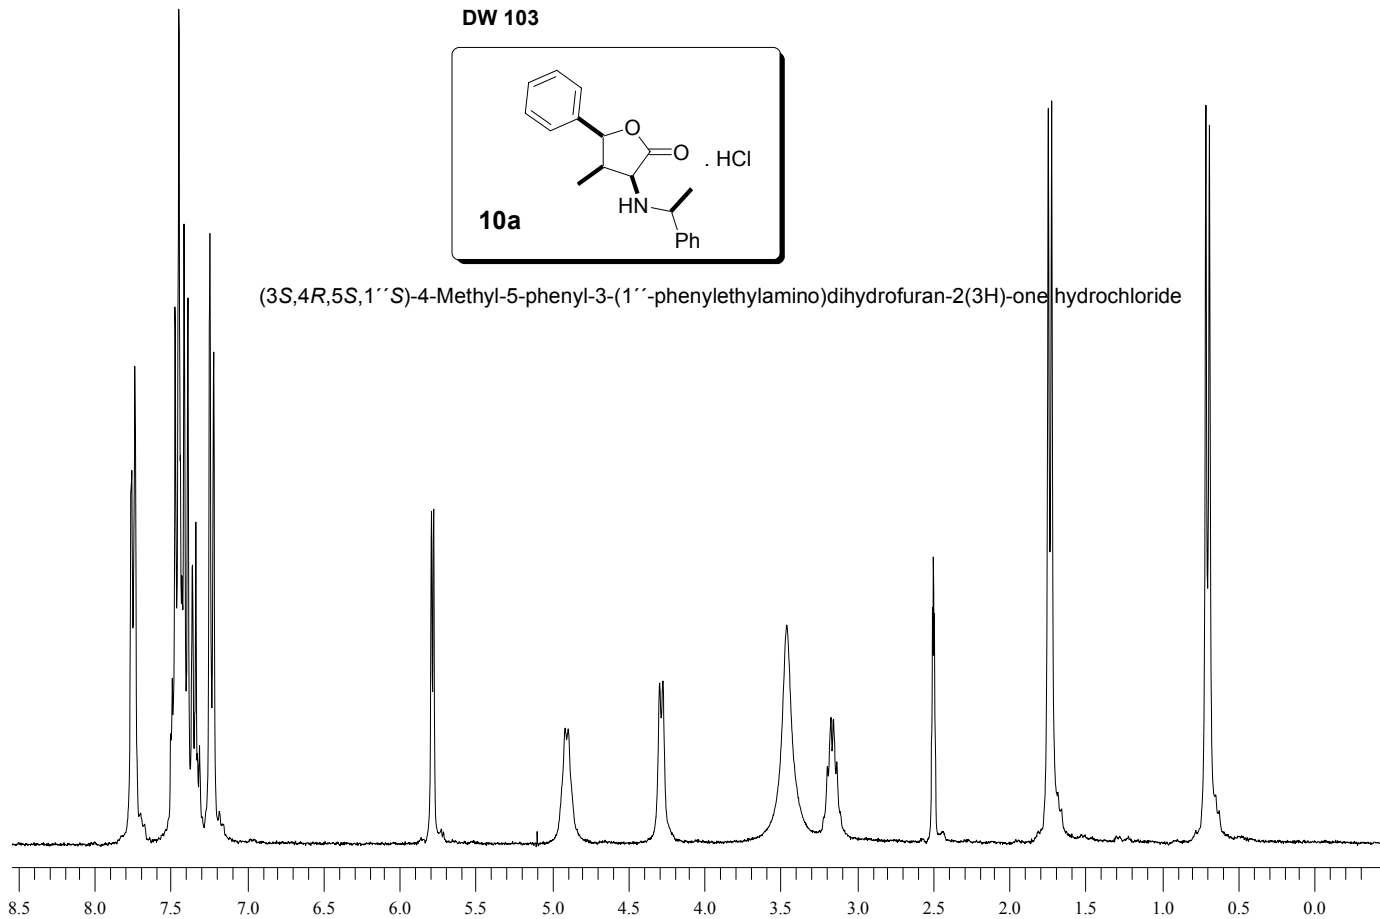

DW 103

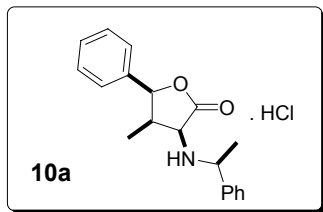

(3S,4R,5S,1''S)-4-Methyl-5-phenyl-3-(1''-phenylethylamino) dihydrofuran-2(3H)-one hydrochloride

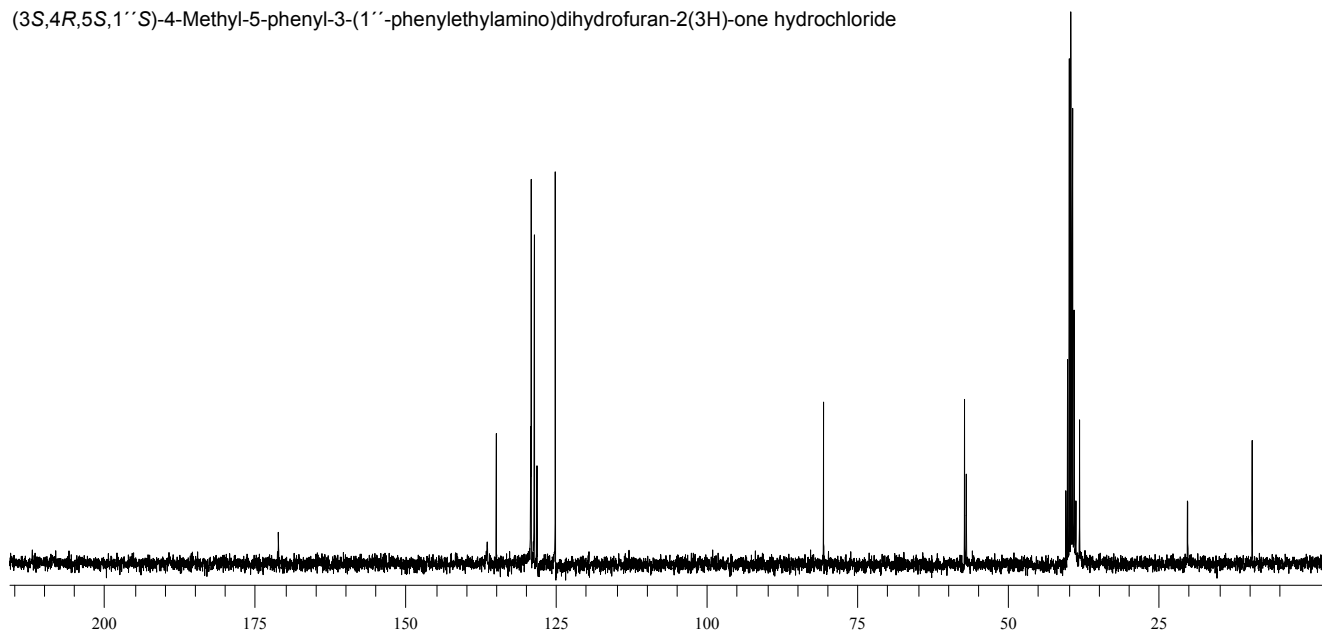

DW 95

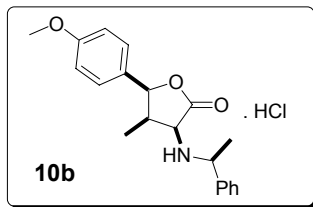

(3S,4R,5S,1''S)-5-(4-methoxyphenyl)-4-methyl-3-[(1''-phenylethyl)amino]dihydrofuran-2(3H)-one hydrochloride

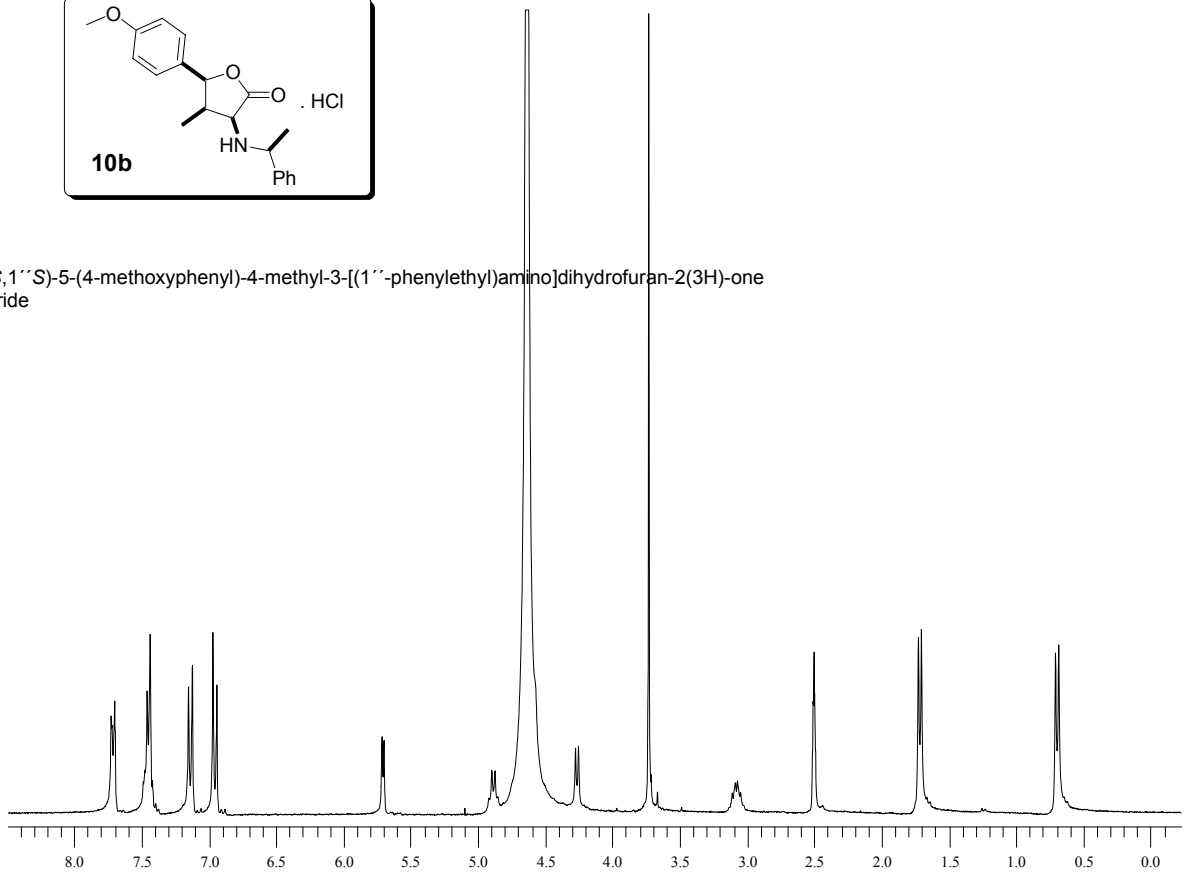

DW 95

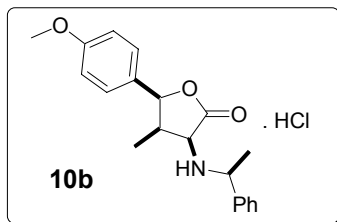

(3S,4R,5S,1''S)-5-(4-methoxyphenyl)-4-methyl-3-[(1''-phenylethyl)amino]dihydrofuran-2(3H)-one hydrochloride

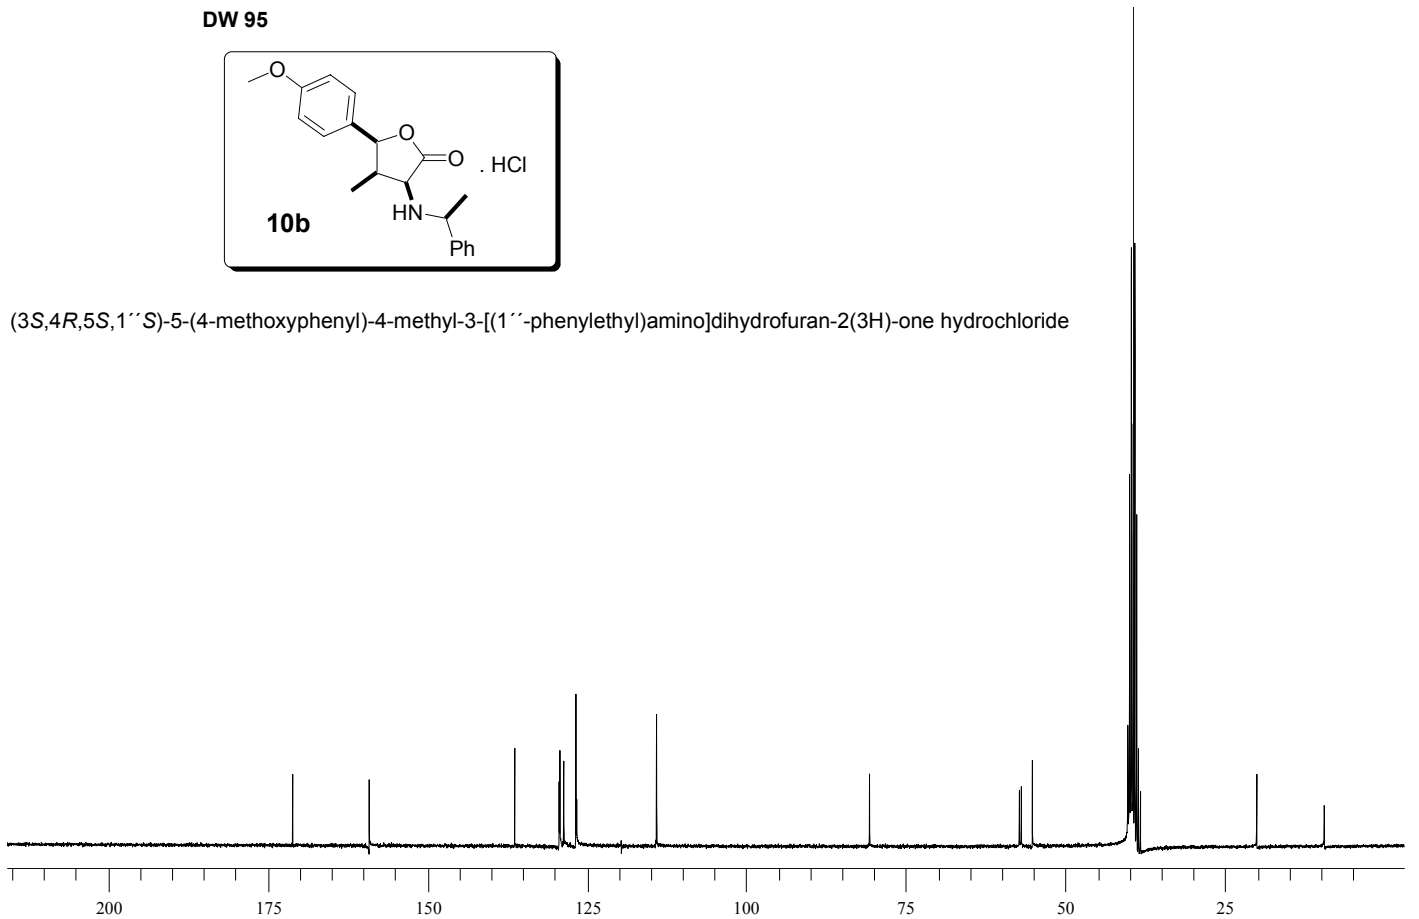

DW 94

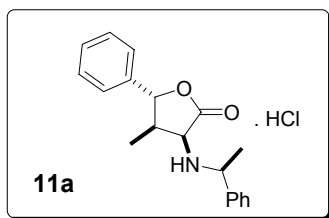

(3S,4R,5R,1''S)-4-Methyl-5-phenyl-3-(1''-phenylethylamino)dihydrofuran-2(3H)-one hydrochloride

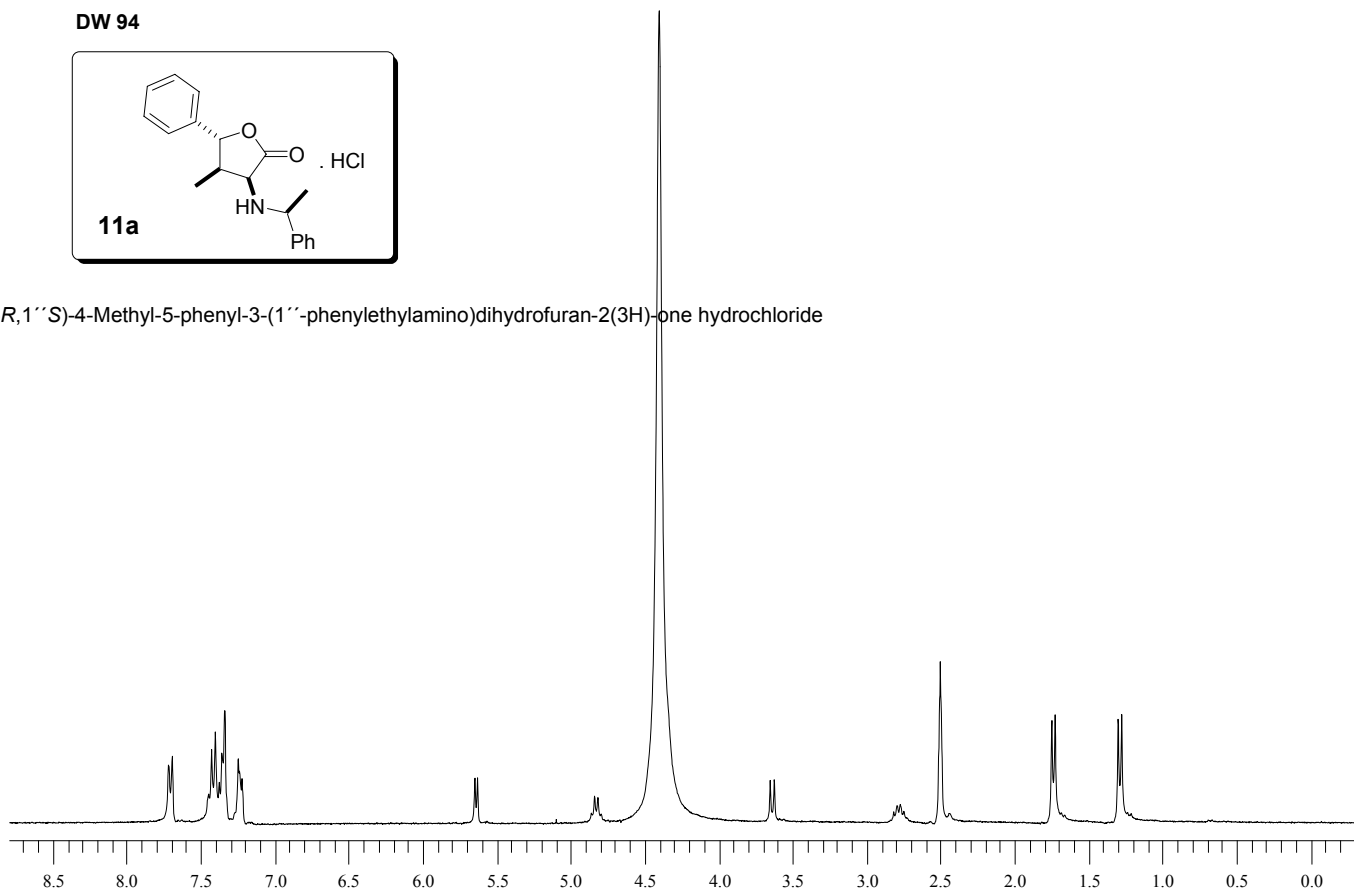

DW 94

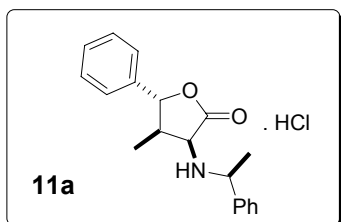

(3S,4R,5R,1''S)-4-Methyl-5-phenyl-3-(1''-phenylethylamino)dihydrofuran-2(3H)-one hydrochloride

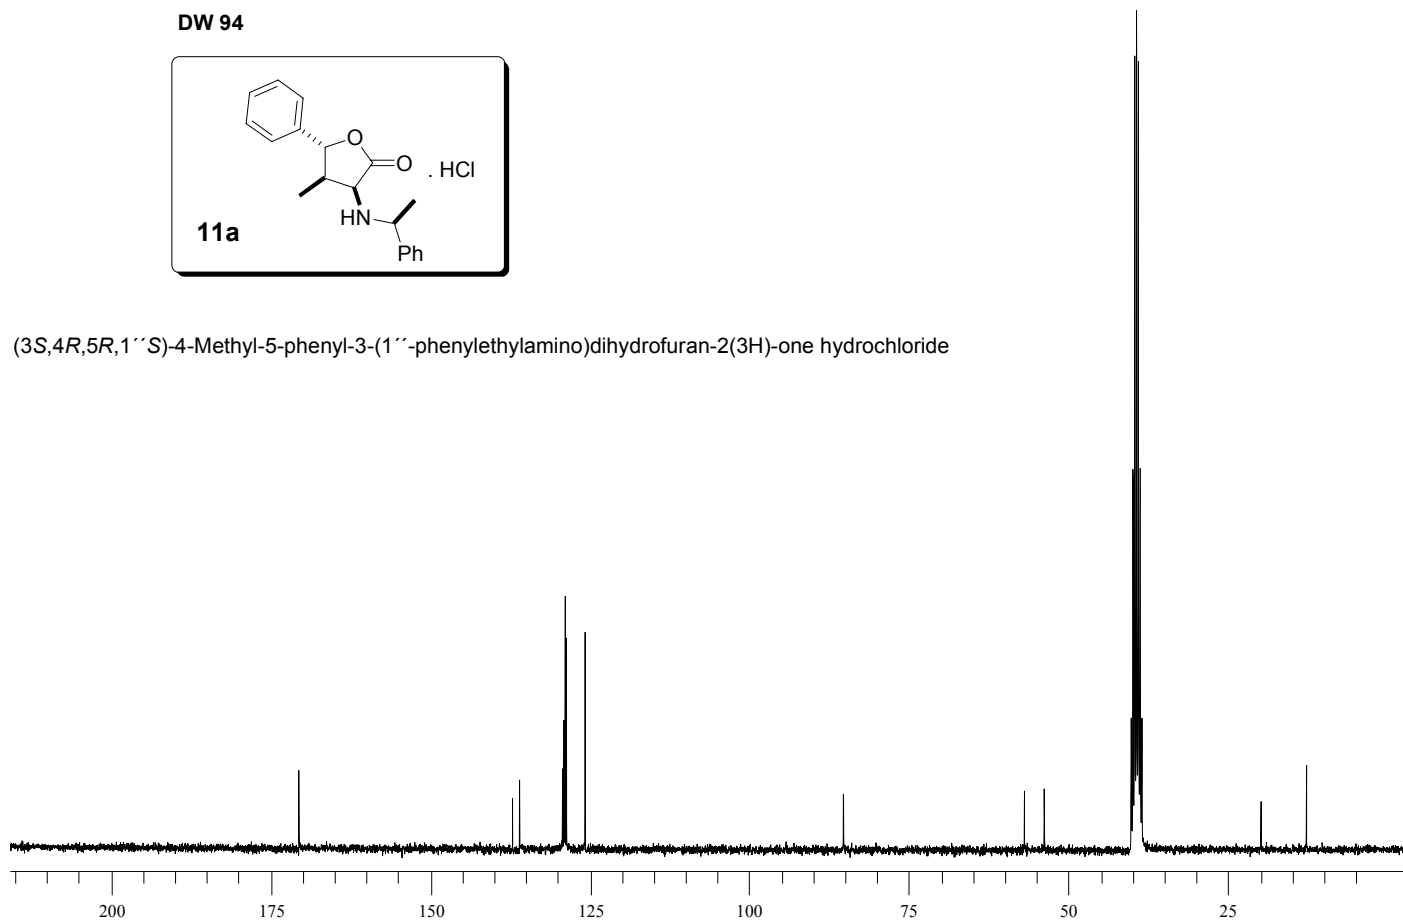

PJ 1024

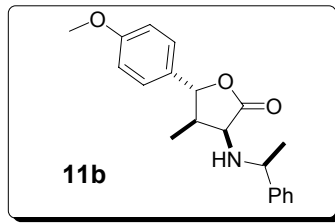

(3S,4R,5R,1''S)-5-(4-methoxyphenyl)-4-methyl-3-[(1''-phenylethyl)amino]dihydrofuran-2(3H)-one

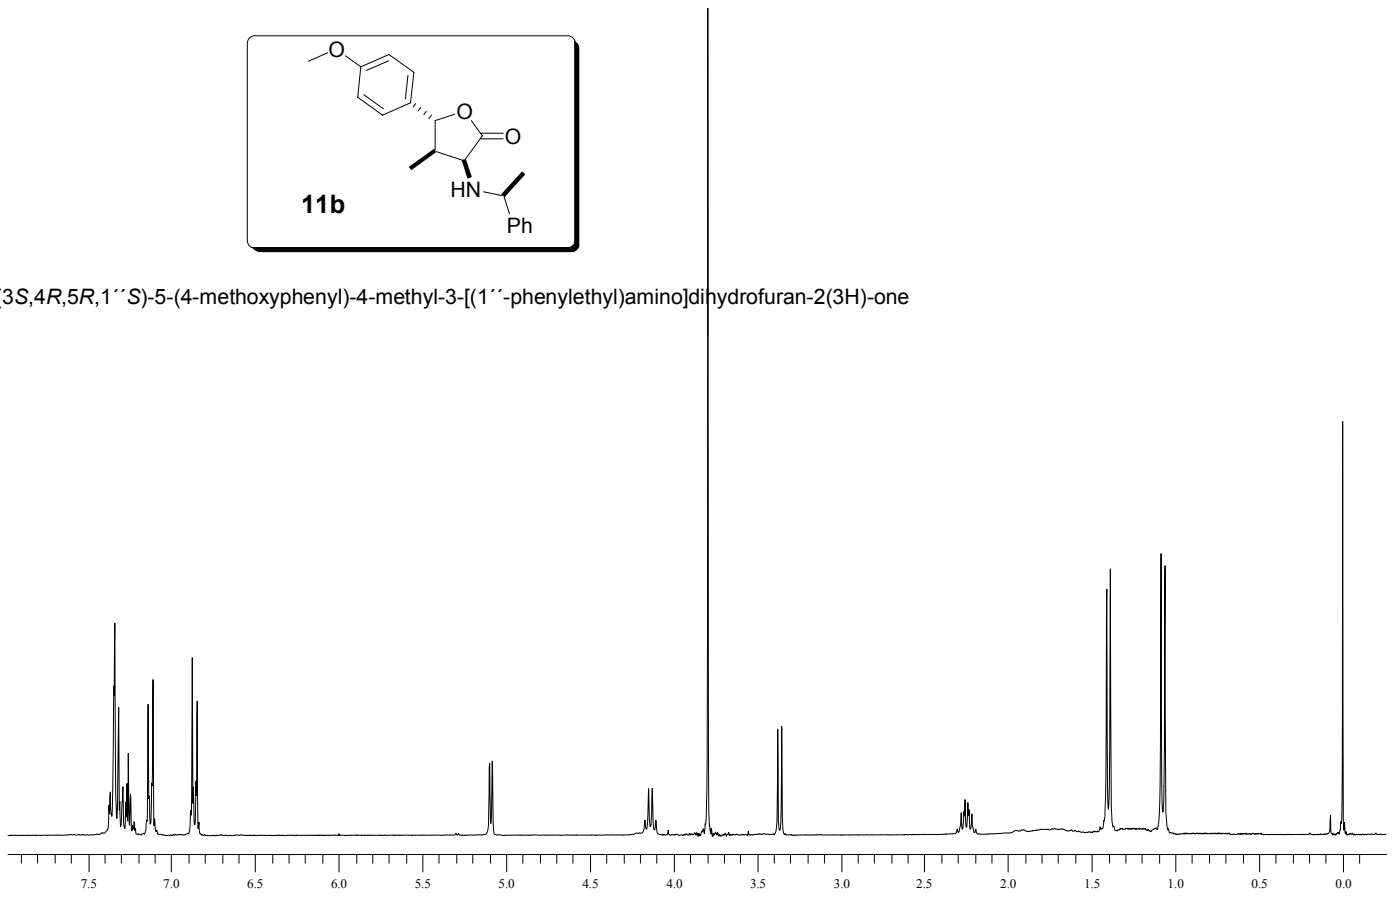

PJ 1024

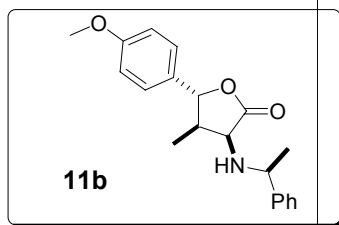

(3S,4R,5R,1''S)-5-(4-methoxyphenyl)-4-methyl-3-[(1''-phenylethyl)amino]dihydrofuran-2(3H)-one

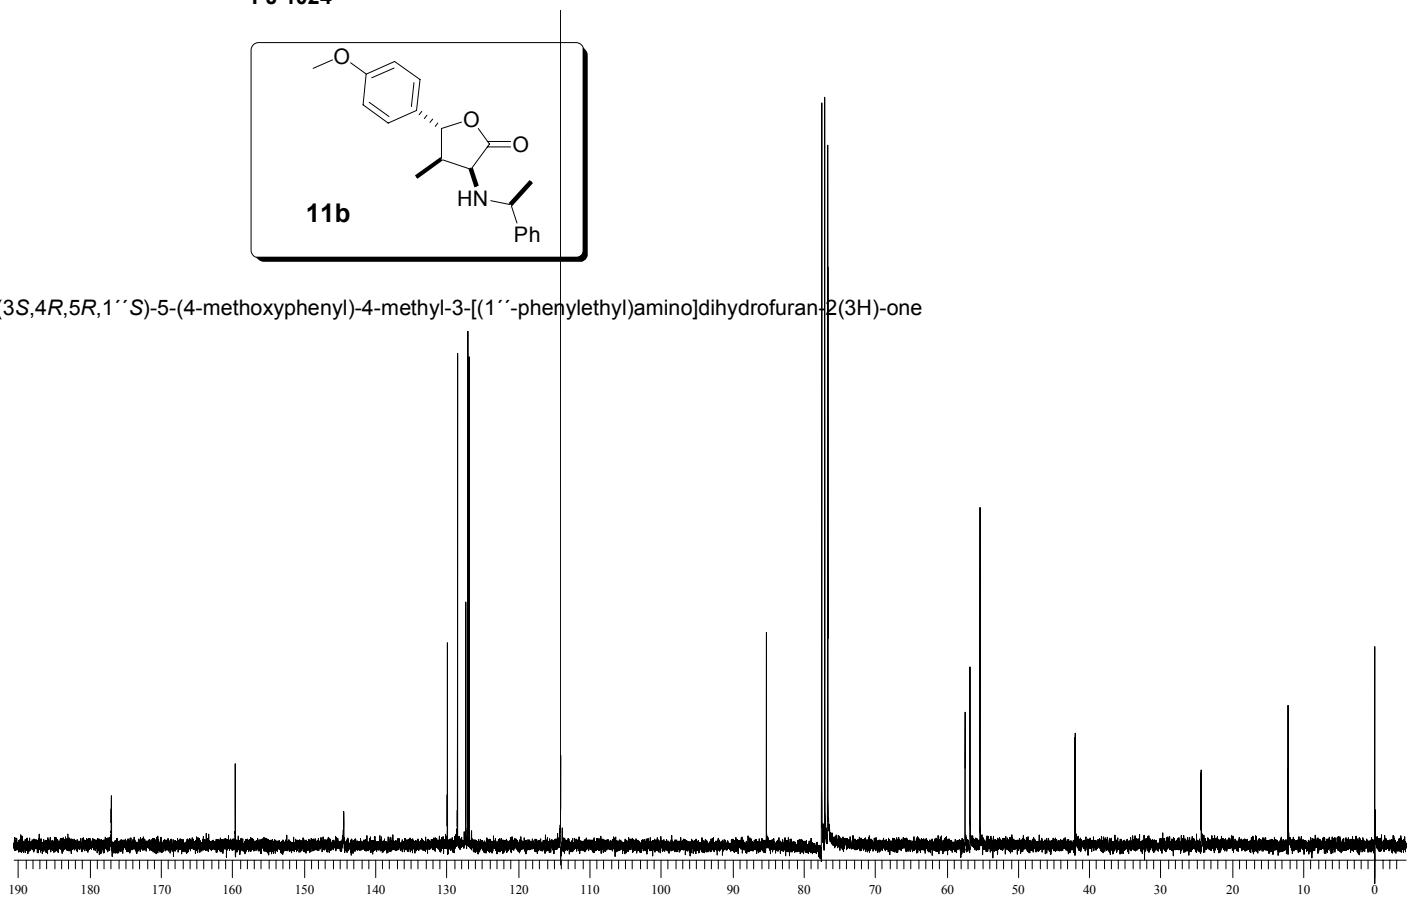

Supplement: b613103d_b.pdf [file b613103d_b.pdf]
